1  
2  
3  
4  
5  
6  
7  
8  
9  
10  
11  
12  
13  
14  
15  
16  
17  
18  
19  
20  
21  
22  
23  
24  
25  
26  
27  
28  
29  
30  
31  
32  
33  
34  
35  
36  
37  
38  
39

## A role of oligodendrocytes in information processing independent of conduction velocity

Sharlen Moore<sup>1,2,3,∅</sup>, Martin Meschkat<sup>1,4</sup>, Torben Ruhwedel<sup>1</sup>, Iva D. Tzvetanova<sup>1</sup>, Andrea Trevisiol<sup>1</sup>, Arne Battefeld<sup>5,‡</sup>, Kathrin Kusch<sup>1</sup>, Maarten Kole<sup>5,6</sup>, Nicola Strenzke<sup>7</sup>, Wiebke Möbius<sup>1,4</sup>, Livia de Hoz<sup>1,#,\*</sup>, Klaus-Armin Nave<sup>1</sup>

<sup>1</sup>Department of Neurogenetics, Max Planck Institute of Experimental Medicine, Göttingen, Germany.

<sup>2</sup>International Max Planck Research School for Neurosciences, Göttingen, Germany. <sup>3</sup>Göttingen Graduate School of Neurosciences and Molecular Biosciences, Germany. <sup>4</sup>Center for Nanoscale Microscopy and Molecular Physiology of the Brain, Göttingen, Germany. <sup>5</sup>Netherlands Institute for Neurosciences, Royal Netherlands Academy of Arts and Science, Amsterdam, The Netherlands. <sup>6</sup>Cell Biology, Faculty of Science, University of Utrecht, The Netherlands. <sup>7</sup>Institute for Auditory Neuroscience, University Medical Center, Göttingen, Germany.

<sup>∅</sup>Current address: Instituto de Fisiología Celular - Neurociencias, Universidad Nacional Autónoma de México, Mexico City, Mexico.

<sup>#</sup>Current address: Charité Medical University, Neuroscience Research Center, Berlin, Germany.

<sup>‡</sup>Current address: Institut des Maladies Neurodégénératives, Université de Bordeaux, Bordeaux, France.

<sup>\*</sup>Corresponding author: [dehoz@em.mpg.de](mailto:dehoz@em.mpg.de)

**Keywords:** myelin, auditory cortex, sound processing, reliability, temporal acuity

40 **Abstract**

41

42 Myelinating oligodendrocytes enable fast impulse propagation along axons as revealed  
43 through studies of homogeneously myelinated white matter tracts. However, gray matter  
44 myelination patterns are different, with sparsely myelinated sections leaving large  
45 portions of the axons naked. The consequences of this patchy myelination for  
46 oligodendrocyte function are not understood but suggest other roles in information  
47 processing beyond the regulation of axonal conduction velocity. Here, we analyzed the  
48 contribution of myelin to auditory information processing using paradigms that are good  
49 predictors of speech understanding in humans. We compared mice with different degrees  
50 of dysmyelination using acute cortical multiunit recordings in combination with behavioral  
51 readouts. We identified complex alterations of neuronal responses that reflect fatigue and  
52 temporal acuity deficits. Partially discriminable but overall similar deficits were observed  
53 in mice with oligodendrocytes that can myelinate but cannot fully support axons  
54 metabolically. Thus, myelination contributes to sustained stimulus perception in  
55 temporally complex paradigms, revealing a role of oligodendrocytes in the CNS beyond  
56 the increase of axonal conduction velocity.

## 57 **Introduction**

58 In the central nervous system (CNS), oligodendrocytes generate myelin, a multilayered  
59 sheath of membrane, spirally wrapped around axonal segments and best known for its  
60 role in enabling fast saltatory impulse propagation <sup>1</sup>. An additional function of  
61 oligodendrocytes is the metabolic support of myelinated axons <sup>2-4</sup>, most important when  
62 axons spike at higher frequency <sup>5</sup>. Mouse mutants with abnormalities of CNS myelination  
63 have been used as models of human leukodystrophies and demyelinating diseases.  
64 However, analyses of these mice have been largely restricted to the diagnosis and  
65 assessment of severely reduced motor functions.

66

67 Importantly, at the network level, the contribution of CNS myelination to information  
68 processing remains poorly understood, in part because suitable phenotyping instruments  
69 have been lacking. Yet, there is an increasing awareness that myelination is required for  
70 higher-order brain functions. Subtle defects of the white matter have been associated with  
71 various psychiatric diseases <sup>6</sup>. Moreover, in the aging brain, the physiological decline of  
72 function is associated with subtle but widespread structural deterioration of myelin <sup>7,8</sup>.

73 Functional studies of myelin have largely been restricted to motor behavior, which is  
74 under control of myelinated axons in white matter tracts, and to the fast impulse  
75 propagation and millisecond precision required for sound location in a highly specialized  
76 circuit of the brain stem <sup>9</sup>. However, myelin is also present within the cortical grey matter,  
77 where it is heterogeneous and patchy along projection neurons <sup>10,11</sup>. Moreover, a large  
78 fraction of the parvalbumin-positive interneuron axons are myelinated <sup>12-14</sup>, even though  
79 their typical short distance to their target cells has been estimated to cause insignificant  
80 conduction delay times <sup>13</sup>. Oligodendrocyte lineage cells can myelinate axons in an  
81 activity dependent manner and influence their conduction velocity properties <sup>15-19</sup>. Mature  
82 oligodendrocytes respond to glutamatergic signals with enhanced glycolytic support of  
83 the axonal energy metabolism <sup>4,5</sup>. These data are compatible with the idea that myelin  
84 function in the CNS that go beyond regulating conduction velocity.

85

86 Indeed, there is still a major conceptual gap between the role of myelin in saltatory  
87 impulse propagation and its function at the network level. Virtually nothing is known about

88 the contribution of myelination to information processing, a function that should be most  
89 evident for pathways that build on constant information transfer, as it is the case for the  
90 auditory system. In the sound location system, nerve conduction velocity is fine-tuned by  
91 myelination beginning at the brainstem level in order to facilitate sound localization<sup>20,21</sup>.  
92 However, the sound location system is a highly specialized circuit dedicated to sub-  
93 millisecond precision of coincidence detection. Auditory processing is clearly broader than  
94 sound localization and must constantly cope with the appearance of both short and  
95 repetitive stimuli. This is essential e.g. for speech perception.

96

97 In humans, myelin abnormalities and nerve conduction velocities have been mostly  
98 studied in terms of developmental delays, and rarely with respect to signal detection,  
99 precision and acuity. And yet, it is clinically well known that patients with myelin disease,  
100 similar to individuals at old age, show deficits in auditory processing<sup>22,23</sup> that cannot  
101 simply be explained by delays in conduction velocity. For example, deficits in speech  
102 recognition in noisy environments increase despite normal hearing thresholds<sup>24</sup>, which  
103 is suggestive of problems in temporal acuity, rather than the speed of processing.

104 In animal models of CNS dysmyelination, a few studies reported general auditory  
105 abnormalities<sup>25–28</sup> or a specific delay at central auditory stations<sup>29–31</sup>, as detected by  
106 evoked response latencies. Using brainstem slices, e.g. Kim et al. reported excitability  
107 defects at the Calyx of Held, a specialized synapse in the brainstem, important for sound  
108 localization<sup>28</sup>. However, the perceptual consequences have not and cannot be assessed  
109 with an *in vitro* system.

110

111 Here, we used a novel approach for the *in vivo* analysis of information processing and  
112 perception in mice as a function of oligodendrocyte and myelin abnormalities. To  
113 determine how dysmyelination and impairments in axonal metabolic support affect  
114 temporal and spectral auditory processing, we compared adult wild type animals with  
115 three lines of mutant mice. We used 1) the *shiverer* mice (*Mbp<sup>shi/shi</sup>*)<sup>32</sup> as a model of  
116 severe dysmyelination, 2) a newly generated *Mbp* allele (*Mbp<sup>neo/neo</sup>*) as a hypomyelination  
117 model (see below), and 3) mice with the heterozygous null allele of the *Slc16A1* gene  
118 (*MCT1<sup>+/-</sup>*)<sup>3</sup>, encoding a monocarboxylate transporter (MCT1) that is required for

119 metabolic support. The use of these mouse models allowed the comparison of different  
120 degrees of myelination, and to distinguish that from the role of oligodendrocytes in axonal  
121 metabolic support.

122

123 Multiunit recordings of the cortex enabled us to test stimulus detection during auditory  
124 processing in combination with behavioral readouts. Altered neuronal responses in the  
125 auditory cortex of dysmyelinated mice were surprisingly complex, and included neuronal  
126 fatigue, likely energy-related, and temporal acuity deficits that clearly exceeded the effect  
127 of delays in conduction velocity. Moreover, deficits in “sound gap detection”, a measure  
128 relevant to speech recognition in humans, indicate that myelination of CNS axons is  
129 critical for normal sound processing beyond the (data not shown) finely tuned conduction  
130 velocity for sound localization. Our data reveal that CNS myelination not only speeds  
131 impulse conduction but also determines the quality of information processing, which we  
132 suggest is partially dependent on the metabolic roles of oligodendrocytes.

## 133 Results

134 To monitor auditory processing in the adult brain with compromised oligodendrocyte  
135 functions, we chose three types of mutant mice. To study the role of compacted myelin,  
136 we compared different *Mbp* mutations in mice. MBP is an abundant structural protein  
137 required for myelin growth and compaction<sup>33,34</sup>. One mutant is defined by the nearly  
138 complete absence of CNS myelin, the well-known *shiverer* (*Mbp<sup>shi/shi</sup>*) mouse<sup>35</sup> with a  
139 truncated *Mbp* gene<sup>32</sup>. The second *Mbp* model was newly generated for this study as a  
140 hypomorph mouse (*Mbp<sup>neo/neo</sup>*) with MBP expression levels below 50% as detailed below.  
141 A third mutant, heterozygous null for the *Slc16A1* gene (*MCT1<sup>+/-</sup>*) shows reduced  
142 expression of the monocarboxylate transporter MCT1, which is required by  
143 oligodendrocytes to metabolically support axons<sup>3</sup>. MCT1 enables the export of lactate  
144 and pyruvate and supports the generation of ATP in myelinated axons<sup>5</sup>.

145

### 146 ***Mbp<sup>neo</sup>*: a novel mouse mutant with reduced myelin sheath thickness**

147 Shiverer mice have no compact myelin and a shivering phenotype that makes them  
148 suboptimal for behavioral testing. Since heterozygous *Mbp<sup>shi/+</sup>* mice show close to normal  
149 amounts of myelin<sup>36</sup>, we sought to establish a hypomyelinated mouse model by reducing  
150 *Mbp* expression levels below 50% (see methods and Figure S1A), in agreement with  
151 earlier observations of transgenic complementation of *shiverer* mice<sup>37,38</sup>.  
152 Oligodendrocytes in adult *Mbp<sup>neo/neo</sup>* brains expressed 30% of the *Mbp* mRNA and 20%  
153 MBP at the protein level (Figures S1B and S1C). These mutants appeared clinically  
154 normal and were long-lived. Different from conventional *shiverer* mice, in which the vast  
155 majority of optic nerve axons are unmyelinated<sup>35</sup>, *Mbp<sup>neo/neo</sup>* mice have 75% of their optic  
156 nerve axons myelinated (wild type: 92%). Importantly, this myelin was fully compacted  
157 but significantly thinner, as determined by g-ratio analysis (Figures S1D to S1F). Axon  
158 caliber distribution was not different between wild type and *Mbp<sup>neo/neo</sup>* mice (Figure S1G).

159

### 160 **Central dysmyelination causes signs of auditory neuropathy**

161 In wild type mice, all auditory projections, including the auditory nerve, are well myelinated  
162<sup>39,40</sup>. Before studying the effect of dysmyelination on information processing, we  
163 determined latencies and amplitudes of sound-evoked responses at different auditory

164 stations using auditory brainstem responses (ABR), recorded *in vivo* through electrodes  
165 located on the scalp (Figure 1A i). ABRs consisted of five waves (I-V) that reflect the  
166 consecutive activation of the auditory nerve, cochlear nucleus, superior olive, lateral  
167 lemniscus and inferior colliculus (Figure 1A ii). In the *Mbp<sup>shi/shi</sup>* mice, ABR waves were  
168 significantly delayed at all auditory stations (Figures 1B and 1C) and delays increased  
169 progressively. The peak-to-peak amplitude, which reflects the synchronous spiking in  
170 response to sound onset, was unchanged in wave I (Figure 1F). This, together with the  
171 findings that also response thresholds were not different from controls (Figures S2A and  
172 S2B), confirms that cochlear function and peripheral conduction is normal in *Mbp<sup>shi/shi</sup>*  
173 mice. This was expected because the outer region of the auditory nerve is myelinated by  
174 Schwann cells that do not require MBP for myelination (Figure 1A iii)<sup>40</sup>. However, the  
175 amplitudes of waves II and III were reduced, and those of waves IV and V were increased  
176 (Figures 1B and 1F). Such downstream improvements of diminished brainstem ABR  
177 amplitudes have been observed in several animal models of auditory  
178 synaptopathy/neuropathy (disorders of the inner hair cell ribbon synapse and/or auditory  
179 nerve), and are thought to reflect compensatory mechanism of changes in gain to  
180 peripheral hearing loss<sup>41–46</sup>. Hypomyelinated *Mbp<sup>neo/neo</sup>* mice were similarly normal with  
181 respect to the shape of ABR wave I (Figures 1D and 1E) and threshold (Figure S2C).  
182 They also showed a reduction in the amplitudes of waves II and III, and a larger wave V  
183 at the IC level (Figure 1G). The *Mbp<sup>shi/shi</sup>* and *Mbp<sup>neo/neo</sup>* wave V/I ratio increase appeared  
184 proportional to the degree of dysmyelination (230% and 100% increase respectively;  
185 Figure 1F and 1G, bottom right). In contrast to the dysmyelination models, *MCT1<sup>+/-</sup>*  
186 mutants revealed no changes in threshold, latency, or amplitude of ABR waves (Figures  
187 S2E to S2H). Thus, latency increase, and signal desynchronization are a result of partial  
188 or complete dysmyelination, unrelated to metabolic defects.

189

### 190 **Myelination of primary auditory cortex is patchy and heterogeneous**

191 To study auditory processing, we first assessed the presence of myelin—in the inferior  
192 colliculus (IC), an important subcortical relay station in the auditory path, and in layer 4 of  
193 the primary auditory cortex (ACx), where we obtained multi-unit recordings (Figure 2A).  
194 As in other grey matter areas, myelination profiles are present at low density<sup>10,13</sup>.



195 Compared to the IC, myelination of the ACx was even sparser (Figure 2B, left upper  
196 panel). In *Mbp<sup>shi/shi</sup>* mice there was no compact myelin, but oligodendrocyte processes  
197 loosely ensheathed the axons. Interestingly, when quantified, both *Mbp<sup>shi/shi</sup>* (*shiverer*)  
198 and *Mbp<sup>neo/neo</sup>* mice had the same number of ensheathed axons (quantified irrespective  
199 of their compaction) in the ACx as their respective controls (Figure 2B, right panels  
200 graphs). Dysmyelination of *Mbp<sup>neo/neo</sup>* was only obvious by electron microscopy (Figure  
201 2B, lower insets). Wild type axons were surrounded by electron-dense (compact) myelin  
202 (Figure 2B, left panels), *Mbp<sup>shi/shi</sup>* axons were loosely ensheathed (Figure 2B, right upper  
203 panel) and *Mbp<sup>neo/neo</sup>* mice exhibited an intermediate profile with compact but thinner  
204 myelin compared to wild type (Figure 2B, right lower panel).

205

### 206 **Cortical responses to simple sounds in dysmyelinated mice**

207 To study the effect of dysmyelination, we performed *in vivo* extracellular recordings in  
208 *Mbp<sup>shi/shi</sup>* mice (Figure 3A) following basic single sound stimuli (clicks) to evoke  
209 responses. Surprisingly, at the level of the IC, we obtained an increased response  
210 strength compared to controls (Figures 3B and S3A). However, at the level of the ACx,  
211 response strength was similar to controls both in *Mbp<sup>shi/shi</sup>* (Figures 3C and S3B, left) and  
212 *Mbp<sup>neo/neo</sup>* mice (Figures 3D and S3B, middle). In contrast, response latencies (Figure 3E)  
213 were increased in *Mbp<sup>shi/shi</sup>* at both auditory stations (Figures 3C, 3F and 3G) similar to  
214 *Mbp<sup>neo/neo</sup>* mice (Figures 3D and 3H), and this increase correlated with the degree of  
215 dysmyelination (Figure S3B right). Response jitter (Figure S3C) and inter-trial reliability  
216 (Figure S3G) were not different in any of the models or stations (Figure S3D to S3F and  
217 S3H to S3J). Not surprisingly, cortical neurons in the normally myelinated *MCT1<sup>+/-</sup>* mice  
218 responded like controls to simple clicks and showed only a tendency towards longer  
219 latencies (Figure S3K to S3N).

220 Changes in the ion channel distribution of the axon initial segment (AIS) are believed to  
221 underlie dysmyelination-dependent changes of excitability<sup>47</sup>. Puzzled by the fact that the  
222 hyperexcitable responses detected in the IC of *Mbp<sup>shi/shi</sup>* mice were not present in the ACx  
223 (Figure 3B to 3C and S3A to S3B), we measured AIS length in the ACx. Interestingly,  
224 here *Mbp<sup>shi/shi</sup>* mice exhibited a reduction in the lengths of AIS (Figures S4A and S4B),



225 which may explain the absence of hyperexcitable responses, as a short AIS is typically  
226 associated with reduced intrinsic neuronal excitability<sup>47–49</sup>.

227

### 228 **Spectral processing of pure tones**

229 Key features of spectral processing are frequency tuning and response adaptation, both  
230 of which are strongly influenced by neuronal integration, i.e. the functional convergence  
231 of stimuli onto individual cortical neurons. Frequency tuning, a property of the auditory  
232 system, builds on frequency-specific inputs onto a given cell and is modulated by lateral  
233 inhibition. Thus, differential conduction velocities in converging pathways as a result of  
234 reduced myelination could have a lasting effect on neuronal integration. Surprisingly,  
235 upon stimulation with pure tones (Figure 3I), tuning curves had comparable shapes in  
236 *Mbp<sup>shi/shi</sup>* and wild type mice, as a function of sound intensity (Figure 3J), and covered  
237 comparable best-frequency (BF) ranges within the sampled regions (Figure 3K). There  
238 was no difference between groups in hearing thresholds (Figure 3L) or tuning bandwidth  
239 (Figure 3M), which depends largely on convergent inputs<sup>50</sup>.

240

241 Adaptation is crucial for sensory filtering in the auditory system<sup>51,52</sup> and a measure of  
242 neuronal integration. It is typically tested using oddball paradigms (Figure S4C), in which  
243 two frequencies that elicit responses of similar magnitude are presented sequentially such  
244 that one appears with higher probability ('standard') than the other ('deviant'). Here,  
245 stimulus-specific adaptation (SSA) is reflected in a decreased response to the standard  
246 tone, while the response to the deviant tone remains constant or increases<sup>52,53</sup>.  
247 Importantly, cortical SSA was not reduced in *Mbp<sup>shi/shi</sup>* compared to wild type mice (Figure  
248 S4D). Thus, widespread dysmyelination had no obvious effect on the integration of  
249 auditory stimuli, presumably because the convergent inputs were all similarly delayed.

250

### 251 **Dysmyelination affects temporal reliability and acuity of sound processing**

252 Naturally occurring sounds are characterized by rich temporal structures. In many  
253 species, the reliable temporal coding of communication sounds is an important factor for  
254 survival or successful mating. Correct auditory coding relies on the ability of the nervous  
255 system to convey the temporal structure of sounds with precise spike timing and to

256 maintain this precision while listening to continuous sound streams. We determined, on  
257 one hand the neuronal capacity of our mouse models to follow click-trains (a measure of  
258 temporal reliability) at different presentation rates. We also determined ‘gap-detection’, a  
259 measure of temporal acuity, as used for audiometric testing in humans <sup>54–56</sup>.

260

261 Click-rate detection was tested with a set of 10 clicks presented at different temporal rates  
262 (Figure 4A). In wild type mice, the rates at which auditory neurons can follow were lower  
263 in ACx compared to subcortical stations, consistent with a previous report <sup>57</sup>. Repeated  
264 presentations revealed that the timing of spikes is reproducible, although failures were  
265 observed in the response to the last clicks in this sequence (Figure 4B, top). Importantly,  
266 in *Mbp<sup>shi/shi</sup>* mice, ACx neurons followed the initial clicks in a set of 10, but (already in the  
267 5 Hz condition) revealed a strong decay in the response strength to the last clicks  
268 (individual example Figure 4B, bottom). Scoring the responses to click number 1, 5 and  
269 10 (taken as representatives), we observed that the response magnitude in *Mbp<sup>shi/shi</sup>* mice  
270 was the same as in wild type after click 1 but was smaller after click 5 and virtually non-  
271 existent by click 10 (Figure 4C). This decrease in response magnitude was associated  
272 with a decreased synchrony of spiking (between repetitions along the 10 clicks) compared  
273 to wild type (Figure 4D and 4E). A similar effect was observed in the cortex of *Mbp<sup>neo/neo</sup>*  
274 mice (Figure 4E center). Thus, ‘naked’ axons of *Mbp<sup>shi/shi</sup>* mice were not a prerequisite for  
275 this observation. Importantly, *MCT1<sup>+/-</sup>* mice, which are normally myelinated but fail to fully  
276 support axonal energy metabolism, exhibited the same deficit, which was evident at even  
277 slower click rates (Figure 4E right). This suggests that axonal energy deficits are the likely  
278 cause of conduction failure following repetitive neuronal firing.

279

280 The observed deficit in temporal reliability could be explained by the altered K<sub>v</sub> channels  
281 distribution (dispersed along internodes and overexpressed in *Mbp<sup>shi/shi</sup>*) in axonal  
282 excitable domains <sup>58</sup>, which we confirmed in the form of shortened AIS for the ACx of  
283 *Mbp<sup>shi/shi</sup>* mice at the level of the AIS (Figures S4A and S4B). In a dysmyelinated brain,  
284 axonal excitability, membrane repolarization, and energy consumption could be affected  
285 by the general misdistribution of ion channels <sup>47,59</sup>. As a model for other CNS white matter  
286 tracts that are difficult to study directly, we used a well-established optic nerve preparation

287 <sup>60</sup>. This acute *ex vivo* system allowed us to measure compound action potentials (CAP)  
288 for myelinated axons (Figure S5A) and to apply pharmacological manipulations <sup>4,5,60</sup>. In  
289 wild type optic nerves (ON), CAPs exhibited the expected 3-peak shape, but we observed  
290 strong differences with both *Mbp<sup>shi/shi</sup>* and *Mbp<sup>neo/neo</sup>* nerves. In these mutants, CAP peaks  
291 were delayed in latency (Figure S5B) reflecting slowed nerve conduction velocity (Figure  
292 S5C) proportional to the level of dysmyelination (Figures S5D). Dysmyelinated optic  
293 nerves also showed a decrease in peak amplitude (Figure S5B) and CAP area (Figure  
294 S5G), suggesting conduction blocks in the ON, and we noted an increase of the  
295 hyperpolarizing phase with a larger negative CAP area (Figure S5H). These features  
296 were similar to CAP recordings from the spinal cord of *Mbp<sup>shi/shi</sup>* mice <sup>58</sup>. To test our  
297 hypothesis that excess potassium fluxes in dysmyelinated *Mbp<sup>shi/shi</sup>* optic nerve axons  
298 cause energy loss (due to repolarization-associated ATP consumption) and contribute to  
299 reduced temporal reliability, we blocked potassium channels with 4-aminopyridine (4-AP,  
300 25  $\mu$ M) in a bath application. This treatment normalized the CAP amplitude and  
301 decreased the hyperpolarizing phase of *Mbp<sup>shi/shi</sup>* axons (Figures S5F gray, S5G  
302 rightmost and S5H rightmost). This finding is compatible with abnormal ion fluxes in the  
303 mutant axons, which increase ATP consumption and cause abnormal repolarization  
304 dynamics.

305  
306 The second key aspect of auditory processing is temporal acuity. Gap-detection protocols  
307 measure the ability of neurons to detect short silent gaps in the middle of a white noise  
308 sound (Figure 5A), a capacity also crucial in human speech processing <sup>61</sup>. In mice, the  
309 presence and the strength of any post-gap sound response reflects whether the gap has  
310 been detected (Figure 5B). *Mbp<sup>shi/shi</sup>* mice revealed a significant decrease (compared to  
311 wild types) in their post-gap response strength for gaps shorter than 3 ms in duration  
312 (Figures 5B and 5D). Quantification of this effect (by comparing for each recording the  
313 ratio between baseline activity and post-gap activity) confirmed that the cortical neurons  
314 of *Mbp<sup>shi/shi</sup>* mice failed to detect small gaps (Figure 5C). A milder but similar effect was  
315 observed in *Mbp<sup>neo/neo</sup>* mice (Figures 5E, S6A and S6B), suggesting that these temporal  
316 acuity deficits reflect the level of dysmyelination. Importantly, *MCT1<sup>+/-</sup>* mice revealed only  
317 very minor gap detection deficit compared to their respective controls (Figures S6C to

318 S6E). Thus, loss of temporal acuity must be attributed to hypomyelination, rather than  
319 reduced metabolic support of the axonal compartment.

320

### 321 **Behavioral correlates of reduced temporal acuity**

322 To understand the correlation between gap-detection deficits and perception at the  
323 behavioral level we performed two tests in behaving mice. First, we tested ‘gap-  
324 dependent pre-pulse inhibition of the acoustic startle reflex’ (GDIASR). This paradigm is  
325 widely used to behaviorally assess the detection of gaps within sound stimuli <sup>62–65</sup>. For  
326 this test we could only use hypomyelinated *Mbp<sup>neo/neo</sup>* mice that have no motor defects.

327

328 Pre-pulse inhibition of the acoustic startle reflex (ASR) requires sensorimotor gating.  
329 Acoustic startles are triggered by a loud unexpected sound <sup>66</sup> and can be measured by a  
330 piezo element under the animal (Figure S7A). A change in the sound background, for  
331 example a ‘silent gap’ just before the startling sound (Figure 6A), can inhibit the ASR if it  
332 is salient enough <sup>67</sup>. In this paradigm, we used the level of inhibition by different ‘silent  
333 gap’ lengths (Figure S7B) as a behavioral measure of gap-detection (i.e. gap perception).  
334 Consistent with previous reports from wild type mice <sup>62,65,67,68</sup>, shorter gaps elicited less  
335 inhibition than longer gaps (Figure 6B). Importantly, dysmyelinated *Mbp<sup>neo/neo</sup>* mice  
336 showed a significant decrease in the inhibition of the ASR, when triggered by different  
337 gap lengths. Moreover, we determined a two-fold increase in the gap detection threshold  
338 (from 8 ms to 17 ms) (Figure 6B and 6C). Thus, deficits in temporal acuity, discovered at  
339 the physiological level in the ACx, were also paralleled at the perceptual level. We note  
340 that mice with slightly higher levels of *Mbp* expression, i.e. thinly myelinated heterozygous  
341 *Mbp<sup>shi/+</sup>* mutants, did not show a reduction in basic startle or in gap-perception (Figures  
342 6B, 6C, S7C and S7D). Thus, significant hypomyelination (>50%) is required to elicit gap-  
343 detection deficits at the behavioral level.

344

345 To confirm altered gap perception in freely behaving mice, we tested *Mbp<sup>neo/neo</sup>* mutants  
346 in the ‘AudioBox’ (NewBehavior, TSE systems), an automated system for auditory  
347 behavioral testing <sup>69–73</sup>. Animals were exposed to ‘safe visits’ of one cage corner (Figure  
348 S7E), in which a continuous sound was played, and water was always available.

349 However, during ‘conditioned visits’ of that corner the continuous sound was interrupted  
350 by a series of 50 ms ‘silent gaps’ that were paired (i.e. negatively conditioned) with short  
351 air-puffs to the nose when animals attempted to drink. We then compared the sensitivity  
352 to different gap lengths in mutants and controls ranging between 1 and 45 ms (Figures  
353 6D and S7F). For each gap length we quantified the percentage of visits in which the mice  
354 avoided penalized nose-pokes, indicating perception of this gap. Despite equivalent  
355 sound exposure in the Audiobox (Figure S7G), gap detection threshold was increased to  
356 4 ms in *Mbp<sup>neo/neo</sup>* compared to the 2 ms threshold of wild type mice (Figure 6E). We  
357 conclude that in freely moving animals, myelination contributes to auditory perceptual  
358 acuity.

359

## 360 Discussion

361 To explore the role of CNS myelination in information processing, i.e. beyond the known  
362 function of myelin in speeding axonal conduction, we studied the detection and perception  
363 of auditory stimuli in mice. We used auditory brainstem potentials and multiunit recordings  
364 in the auditory cortex of mutant mice, as well as behavioral readouts in awake animals,  
365 to compare the effect of partial (*Mbp<sup>neo/neo</sup>*) and complete (*Mbp<sup>shi/shi</sup>*) dysmyelination with  
366 that of an isolated reduction of glial metabolic support (*MCT1<sup>+/-</sup>*). The combined pattern  
367 of results reveals that diminished glial support of axonal metabolism, in the absence of  
368 dysmyelination, impairs sustained stimulus detection relevant for speech processing. The  
369 deficits were largely comparable, although partially discriminable from those resulting  
370 from dysmyelination. Oligodendrocytes, therefore, play an important role in ongoing  
371 perception through energetic support (Figure 7A), most evident when dysmyelination  
372 results in misdistribution of axonal ion channels (Figure 7B), and independent of a role in  
373 saltatory conduction. (Figure 7C).

374

375 On the other hand, subcortical delays in dysmyelinated mice were accompanied by  
376 reduced synchrony of auditory brainstem potentials, a feature not observed in mice with  
377 only reduced glial metabolic support. The decreased amplitudes and shapes of waves II  
378 and III, were likely reflecting some desynchronization of the converging input at the level  
379 of the cochlear nucleus and olivary complex (where ascending auditory signals become

380 bilateral). The later waves IV and V showed instead an increase in size in dysmyelinated  
381 mutants, most likely reflecting a compensatory mechanism to the loss of synchrony at the  
382 earlier stations. Similarly gain increases have been reported in mice deprived of auditory  
383 stimuli <sup>74</sup>, and in humans as a result of aging <sup>44</sup> or multiple sclerosis lesions <sup>7,75–78</sup>.

384

385 While dysmyelination had a strong effect on conduction velocity, spectral processing of  
386 simple stimuli (pure tones) in the primary auditory cortex appeared normal. Auditory  
387 information can reach the IC and then the ACx through different parallel pathways, each  
388 of which might be differently affected by dysmyelination. While simple click sounds, and  
389 pure tones are likely activating a limited (possibly the most direct) subset of sound  
390 encoding circuits, responses to these stimuli were normal, indicating that basic relay  
391 processing and sound integration is not affected by the absence of myelin. However, we  
392 detected deficits in temporal processing in a manner unexplained by reduced conduction  
393 velocity alone. Temporal reliability and acuity were affected in all mutants. Unexpectedly,  
394 the magnitude of this defect was correlated with the degree of hypomyelination but was  
395 not limited to dysmyelination phenotypes. It was also a feature of MCT1<sup>+/-</sup> mice with an  
396 isolated metabolic support defect. Behavioral tests demonstrated that the temporal  
397 processing deficits, as detected by cortical multi-unit recordings, were paralleled at the  
398 perceptual level. Myelinating oligodendrocytes are thus clearly involved in the temporal  
399 processing of auditory signals, which have previously been implicated in higher CNS  
400 functions in humans, such as speech recognition <sup>79–81</sup>. Here, the phenotypical similarities  
401 of two different mouse mutants, *Mbp*<sup>neo/neo</sup> and MCT1<sup>+/-</sup>, suggest that compromised  
402 metabolic support alone is a critical component of reduced myelination and becomes  
403 detectable at the network level in the absence of any sign of axonal degeneration.

404

405 Myelination defects clearly affected the coding of a stimulus' temporal envelope, reflected  
406 for example as 'fatigability', i.e. a lack of temporal reliability. For *Mbp* mutants it was  
407 unexpected that the responses to longer trains of clicks diminished or even stopped after  
408 5 to 6 repetitions of the stimulus, especially when the intervals between consecutive clicks  
409 were 200 ms apart (repetition rate 5 Hz). Here, the altered distribution of sodium and  
410 potassium channels in unmyelinated regions is critical. In *Mbp*<sup>sh1/sh1</sup> mice sodium channels



411 are increased along bare axons<sup>82,83</sup>, and abnormally high expression of Nav1.2 channels  
412 does not revert to Nav1.6 in development<sup>84,85</sup>. This might contribute to increased  
413 fatigability in *Mbp<sup>shi/shi</sup>* mice since Nav1.6 channels are not only associated with - but also  
414 necessary for - repetitive firing<sup>86</sup>. In addition, an elongation of nodes<sup>58,87</sup> and  
415 overexpression of Kv1.1 and Kv1.2 potassium channels has been reported in *shiverer*  
416 mice<sup>58,88</sup>. Kv1 channels are normally clustered at juxtaparanodal domains<sup>89</sup> but may  
417 become abnormally exposed to the extracellular space upon dysmyelination and  
418 redistribute into the paranodal and internodal membrane causing increased Kv1-mediated  
419 potassium efflux. In the absence of myelin, oligodendrocyte-dependent potassium  
420 siphoning would be reduced<sup>90</sup>. Together, this might lead to a greater activity-driven  
421 accumulation of extracellular potassium, decreasing its driving force and resulting in a  
422 longer time course of membrane hyperpolarization. In agreement with these findings,  
423 when potassium channels in *shiverer* mice were acutely blocked with 4-AP in the *ex vivo*  
424 electrophysiological recordings of *Mbp<sup>shi/shi</sup>* optic nerves (our accessible model of a  
425 dysmyelinated tract), we noted a partial restoration of single compound action potential  
426 (CAP) amplitude and a smaller hyperpolarization phase. The latter is consistent with the  
427 efficiency of 4-AP as a symptomatic treatment for MS<sup>91</sup>.

428  
429 Interestingly, reduced reliability was also observed in the *MCT1<sup>+/-</sup>* mice, without  
430 dysmyelination, suggesting that reduced metabolic support to axons might be one of the  
431 responsible mechanisms. An indirect effect, and not necessarily an alternative  
432 explanation to the channel misdistribution, is the burden of dysmyelination and increased  
433 ion fluxes on the energy consumption of axonal Na<sup>+</sup>/K<sup>+</sup> ATPases, postulated to be a  
434 contributing factor to axonal degeneration in demyelinated plaques of multiple sclerosis  
435 (MS)<sup>92</sup>. Indeed, hearing difficulties have been reported also in MS patients<sup>78</sup>. In the *Mbp*  
436 mutants, inadequate support might occur locally but have a dominant effect on the entire  
437 pathway. For example, lack of myelin might reduce energy reserves at higher spiking  
438 rates when the ATP-dependent ion pumps are most active. This might cause conduction  
439 blocks in the absence of axonal degeneration.

440



441 In addition to some loss of ‘temporal reliability’, we determined a myelination dependent  
442 defect of ‘temporal acuity’, i.e. a defect in the coding of rapid changes in the temporal  
443 structure of the stimulus. Here, a powerful paradigm is sound gap-detection<sup>54,93</sup>, a  
444 function that relies on cortical auditory processing<sup>65,94–96</sup>. In humans, defects in such a  
445 gap detection test are closely associated with a corresponding loss of accurate speech  
446 discrimination<sup>97,98</sup>. Cortical neurons of dysmyelinated *shiverer* mice failed to detect silent  
447 gaps within a stream of white noise when these gaps were shorter than 3 ms, a marked  
448 deviation from control mice that detect gaps as short as 0.5-1 ms. Hypomyelinated  
449 *Mbp<sup>neo/neo</sup>* mice exhibited a milder deficit.

450

451 Poor gap detection in *Mbp<sup>shi/shi</sup>* mice could be caused by longer refractory periods and  
452 reduced excitability of the axons secondary to the abnormal distribution of ion channels.  
453 It would explain why these deficits in temporal acuity were less severe in the  
454 hypomyelinated *Mbp<sup>neo/neo</sup>* mice. In contrast, neuronal ‘fatigue’ and the loss of temporal  
455 reliability are both caused by an underlying metabolic problem that is also prominent in  
456 MCT1 heterozygotes.

457

458 All multi-unit recordings were performed in anaesthetized mice. We note that key aspects  
459 of auditory processing occur ‘pre-attentively’ and should be unaffected by anesthetics<sup>99</sup>.  
460 However, neuronal circuits with inhibitory input can behave differently under anesthesia,  
461 which can bias experimental results. Thus, it was important to parallel the  
462 electrophysiological results with behavioral experiments on auditory perception in freely  
463 moving animals. Since motor impaired *Mbp<sup>shi/shi</sup>* mice could not be used for these  
464 experiments, we analyzed mice homozygous for the newly created *Mbp<sup>neo/neo</sup>* allele,  
465 which had no visible motor defects and were long-lived. In this mutant, we confirmed poor  
466 gap detection at the perceptual level by operant conditioning of auditory stimuli and  
467 responses. We observed no such auditory deficits in heterozygous *shiverer* mice, which  
468 exhibit a minor dysmyelination<sup>36</sup>. This suggests that a threshold level of hypomyelination  
469 is required for the auditory phenotype.

470

471 It has become increasingly clear that the role of myelination is not limited to speeding  
472 axonal conduction velocity. Moreover, the patchy myelination pattern of cortical circuits  
473 points to a broader role of oligodendrocytes and myelin in information processing<sup>100</sup>. Our  
474 mouse models with predominant structural or metabolic defects of CNS myelin allowed  
475 exploring the role of myelination at the network level. This enabled us to mechanistically  
476 dissect reliability defects from acuity deficits in auditory processing. Thus, our studies  
477 revealed a novel role of myelin forming oligodendrocytes in information processing that  
478 goes beyond the speeding of neuronal responses. We discovered that myelin influences  
479 the sustained and temporally precise axonal firing, essential to properly code auditory  
480 stimuli. Moreover, specific phenotypical similarities between mutants with dysmyelination  
481 and metabolic defects suggests that a myelin-dependent energetic failure marks a  
482 common mechanism underlying auditory dysfunctions. Auditory phenotyping emerges as  
483 a promising experimental system to investigate the role of oligodendrocytes and  
484 myelination in information processing.

485

## 486 **Methods**

### 487 **Mice**

488 All mice were housed in standard plastic cages with 1-5 littermates in a 12 h/12 h light/dark cycle  
489 (5:30 am/5:30 pm) in a temperature-controlled room (~21°C), with *ad libitum* access to food and  
490 water. All mice used were bred under the C57BL6/N background. Data obtained from male and  
491 female mice were pooled unless otherwise stated. The experimental and surgical procedures  
492 were approved and performed in accordance with the Niedersächsisches Landesamt für  
493 Verbraucherschutz und Lebensmittelsicherheit (licence number 33.19-42502-04-16/2337).

494

495 Homozygous *shiverer* mice were obtained by crossing heterozygotes (*Mbp<sup>shi/+</sup>*). In all  
496 experiments, *Mbp<sup>shi/shi</sup>* mice and their control littermates (Wt) were 6-12 weeks of age, unless  
497 otherwise stated.

498

499 A new hypomyelinated mouse with reduced *Mbp* expression (<50%), was generated by  
500 homologous recombination in ES cells, using a modified *Mbp* gene carrying a LacZ-neomycin  
501 cassette upstream of exon 1. Successful targeting disrupted the 5' regulatory region without  
502 affecting the larger GOLLI transcription unit (Figure S1A). Homozygous *Mbp<sup>neo/neo</sup>* mice were born

503 at the expected frequency. For all experiments, *Mbp*<sup>neo/neo</sup> and controls (Wt) were used at age 9.5-  
504 14 weeks, unless otherwise stated.

505

506 MCT1<sup>+/-</sup> mice, with reduced axo-glial metabolic support <sup>3</sup> were kindly provided by Pierre  
507 Magistretti (Lausanne) and analyzed at age 10-14 weeks.

508

### 509 **Acoustic stimulation**

510 All sound stimuli were digitally synthesized and presented using Matlab (The Mathworks®, USA),  
511 at a sampling rate of 98 kHz and in a pseudorandom order. There were typically 10 repetitions of  
512 each stimulus, unless otherwise stated. The intensities were measured in decibel sound pressure  
513 levels (dB-SPL). Sounds used for electrophysiology were delivered by an USB audio interface  
514 (Octa-capture, Roland, USA), amplified with a Portable Ultrasonic Power Amplifier (Avisoft,  
515 Germany) and played in a free-field ultrasonic speaker (Ultrasonic Dynamic Speaker Viva, Avisoft,  
516 Germany). Calibration of the testing apparatus was made using BBN and click sounds at different  
517 intensities with a Brüel & Kjaer (4939 ¼”) free field microphone, with Brüel & Kjaer amplifier  
518 (D4039, 2610, Denmark). All experiments were performed in a sound-attenuated and anechoic  
519 room.

520

### 521 **Auditory Brainstem Responses**

522 Auditory brainstem responses (ABRs) were measured as described <sup>101</sup>. Mice were anesthetized  
523 with an intraperitoneal injection of 250 mg/kg Avertin (mixture of 2,2,2-tribromoethyl alcohol 2%,  
524 Sigma-Aldrich, and tert-amyl-alcohol 2%, Merck), except for the *Mbp*<sup>neo/neo</sup> line, which was treated  
525 as in Jung et al. (2015) <sup>102</sup> and anesthetized with ketamine (125 mg/kg) and xylazine (2.5 mg/kg)  
526 i.p. Temperature was kept at 36° via a heating pad (World Precision Instruments, ATC 1000). For  
527 the recordings, subdermal needles (BD Microlance, 30G ½”, 0.3x13mm) were placed at the vertex  
528 (active electrode), the left pinna (reference) and the back of the animal (active shielding). Click  
529 stimuli were ipsilaterally delivered from a speaker located ~9 cm from the left ear. Square click  
530 waveforms (0.03 ms long) were presented at 20 Hz (50 ms inter-trial intervals (ITI)) at different  
531 intensities (0-80 dB). The difference in potentials was amplified 10,000 times using a custom-  
532 made amplifier. A National Instruments shielded I/O connector block (NI SCB-68), interfaced in a  
533 Matlab environment was used for data acquisition (50,000 Hz sampling rate). Recorded voltage  
534 traces were bandpass filtered offline (300 - 3000 Hz) using a Butterworth filter. Data was cut from  
535 the stimulus presentation onset (0 ms) in 12 ms windows. Trials with heart rate artifacts (wave  
536 shapes larger than ± 4.7-9.2 µV) were removed, and 1000 trial repetitions of each stimulus were

537 used for data analysis. Hearing thresholds were determined as the lowest intensity that evoked a  
538 response that was 3 times the root mean square of the response at 0 dB within a window of 1 ms  
539 centered on wave I. In addition, this measurement was confirmed by visual inspection of the  
540 lowest intensity that evoked a response (compared to 0 dB) within 6 ms from stimulus onset. The  
541 identity of the waves was determined by visual selection of the maximum peak value  
542 corresponding to each of the five waves according to the typical reported position of each wave  
543 (1 ms apart). For the analysis, an ANOVA was used to assess the changes in latencies or  
544 amplitudes of each wave, comparing control to mutant animals.

545

#### 546 **Electron microscopy**

547 After transcardial perfusion fixation (4% formaldehyde and 2.5% glutaraldehyde in phosphate  
548 buffer), mouse brains were dissected, and sagittal or coronal vibratome (Leica VT1000S) slices  
549 of 200-300  $\mu\text{m}$  thickness were prepared. A punch of the region of interest was taken, prepared  
550 for electron microscopy<sup>103</sup> and embedded in Epon. Ultrathin sections were prepared using a Leica  
551 Ultracut S ultramicrotome (Leica, Vienna, Austria) and imaged with a LEO912 electron  
552 microscope (Zeiss, Oberkochen, Germany) using a 2k on-axis CCD camera (TRS, Moorenweis,  
553 Germany). G-ratios (axonal diameter/fibre diameter) were determined by analyzing 100 axons  
554 per animal selected by systematic random sampling on 10 random images taken at a  
555 magnification of 8,000 x.

556

#### 557 **Acute electrophysiology**

558 Prior to surgery, mice were anesthetized and maintained as reported for the ABR procedure. Mice  
559 were placed on a stereotaxic apparatus using inverted ear bars to avoid damage to the ear canal  
560 (World Precision Instruments, Sarota, FL USA, 502063). A cut was made along the midline and  
561 the skull exposed and cleaned of adherent tissue with a scalpel and hydrogen peroxide. A metal  
562 screw (M1x1, Germany) was inserted into the right parietal cortex and used as ground. A metal  
563 post was glued on the skull frontal to lambda with dental cement (Unifast, TRAD), this allowed for  
564 removal of the ear bars. The muscle temporalis was detached from the skull and a 4x2 mm  
565 craniotomy was performed using a dental drill (World Precision Instruments, Omnidrill3, tip #7),  
566 following the contour delimited rostral and ventrally by the squamosal suture, dorsally by the  
567 temporal ridge and caudally by the lambdoid suture. The speaker was placed ~13 cm from the  
568 right ear of the mouse. At the end of every experiment, mice were euthanized by anesthesia  
569 overdose. The brain was removed, and immersion fixed in 4% PFA. After 24h, the brain was  
570 washed with PBS 1x and stored in 30% sucrose (Merk, K43386951).

571  
572 Recordings were performed with glass-covered tungsten electrodes (AlphaOmega, Germany) or  
573 platinum/tungsten glass coated electrodes (Thomas Recordings, Germany) with impedances  
574 between 1.5 and 2 M $\Omega$ . In 30% of the recordings, the electrode was stained with Dye I  
575 (dioctadecyl-tetramethylindocarbocyanine perchlorate, Aldrich, 468495) dissolved in absolute  
576 ethanol, before insertion, for later visualization of its position. After the craniotomy, a drop of saline  
577 was used to clean the surface of the brain. The electrode was inserted perpendicular to the  
578 surface of the primary auditory cortex<sup>104</sup> using a micromanipulator (Kopf, Inc., Germany). We  
579 recorded extracellular multi-unit (MUA) sound-evoked responses in layer 3/4 of the ACx of  
580 anesthetized mice. Responses were characterized by onset latency and shape. ACx recordings  
581 in *Mbp*<sup>shi/shi</sup> mice were done at a depth of ~405  $\mu$ m (62  $\mu$ m standard deviation (sd)) without  
582 differences in depth between control and mutant mice (p=0.71). In the *Mbp*<sup>neo/neo</sup> line, depth of  
583 recording was on average ~350  $\mu$ m (60.5  $\mu$ m sd) without differences between groups (p=0.520).  
584 In MCT1<sup>+/-</sup> mice, recordings were on average at ~380  $\mu$ m depth (37  $\mu$ m sd) (p=0.32).

585  
586 Electrophysiological signals were acquired at 32 kHz sampling rate, pre-amplified (HS-36-Led,  
587 Neuralynx, USA) and sent to an acquisition board (Digital Lynx 4SX, Neuralynx, USA) to yield the  
588 raw signals, which were acquired using a bandpass filter (0.1 or 200 Hz to 9000 Hz) and stored  
589 for offline analysis. Recording and visualization of the data was made using the Cheetah Data  
590 Acquisition System software (Neuralynx, USA). For multi-unit analysis (MUA), spikes that are not  
591 attributed to a single neuron, the signals were high-pass filtered at 350 Hz. For spike detection, a  
592 threshold of 6 times the mean absolute deviation from the median of the filtered voltage traces  
593 was used. For the analysis, only recordings that had significant auditory evoked responses at any  
594 sound intensity compared to a 200 ms pre-sound baseline activity (paired t-test) were used.

595  
596 To measure tonotopy, *pure tones* of variable frequencies and intensities were presented (24 tones  
597 with frequencies between 2 to 31 kHz, and intensities between 0 and 80 dB) (Figure 3I). Each  
598 tone was 30 ms long, had on/off ramps of 5 ms. Presentation rate was 2 Hz (500 ms inter-trial  
599 interval). Five repetitions of each frequency/intensity combination were presented in a random  
600 order. The analysis was performed on individual recording sites, although in many mice  
601 recordings were obtained from several site along the ACx.

602  
603 For the reconstruction of the single-site tuning (Figure 3J), the spikes elicited by each frequency  
604 in a 200 ms window after stimulus onset were added. The tuning curves (TC) were smoothed

605 using a zero-phase digital hamming filter with a window of 4 points. The smoothed TC were  
606 then used to calculate the best frequency (BF; the frequency that elicited the maximum number  
607 of spikes at 60 and 80 dB). In normalized tuning curves, activity was expressed as a function not  
608 of frequency but of the distance (in octaves) from the best frequency. Response thresholds were  
609 obtained by visual inspection (blinded as to the genotype) of a 200 ms window from stimulus  
610 onset. Tuning curve width both at the base and the half distance from the peak activity (Figure  
611 3M), was calculated as the z-score of the sum of spikes over a 60 ms window from stimulus onset  
612 at all frequencies and intensities.

613  
614 The *click rate* (CR) protocol (Figure 4A) was used to assess temporal reliability. Each was a 0.05  
615 millisecond long positive step function. Bursts of ten clicks were presented every 6 s, each at a  
616 different rate (2 - 50 Hz). The first click of each burst was used to characterize latency, amplitude,  
617 reliability and jitter of auditory response (Figure 3 and S3). For the *latencies* measurement we  
618 only included the spikes that occurred at least 10 ms after sound onset, given latencies reported  
619 for the ACx in anesthetized mice<sup>104</sup>. To measure reliability of repeated responses (click rate  
620 protocol, Figure 4), synchronicity measurements were obtained from a measure of the vector  
621 strength<sup>105</sup> of the spikes occurring for the duration of the stimulation in all repetitions of the  
622 stimulus was obtained by converting each spike time ( $\tau_i$ ) as a circular vector with phase ( $\theta_i$ )  
623 between 0 and  $2\pi$ , according to the stimulus phase of a specific rate. All the spikes occurring after  
624 each of the 10 clicks were selected in terms of their latency respective to the previous click. A  
625 window equivalent to the phase duration (equal to the inter-click interval) was selected for each  
626 click rate presentation. The spike phases were then expressed in terms of:

627 **Equation 1**

$$628 \quad \theta_i = 2\pi \frac{\text{mod}(\tau_i, \rho)}{\rho}$$

629 Here,  $\tau_i$  is the latency of each spike,  $\theta_i$  was the phase representation of each spike, and  $\rho$  was  
630 the phase of the stimulus presented (for example for a click train at 5 Hz,  $\rho = \frac{1}{5}$ ,  $\rho = 0.2$ ). To calculate  
631 the percentage of spike synchronicity, the total spike phase distribution was binned in 20 bins  
632 from 0 to  $2\pi$ , and the spike count of the bin with the maximum synchronization in the first half of  
633 the vector ( $\pi$ ), was taken. This spike count was expressed in terms of percentage, which means  
634 the percentage of spikes that were fully synchronized per stimulus in one recording.

635



636 The *gap-in-noise detection* paradigm was used to evaluate temporal acuity. Once every second,  
637 200 ms long broad band noise (BBN, pre-gap) sound was followed, after a short silent gap, by a  
638 50 ms long BBN sound (post-gap). Silent gaps durations were 0, 0.5, 1, 2, 3, 4, 5, 7, 10, 20, 50  
639 and 100 ms (Figure 5A). Rise/fall time of the BBN pulse was 1 ms. For *gap-detection* analysis,  
640 only recordings with a significant response to the mean of the pre-gap sound (sum of spikes over  
641 100 ms window after stimulus onset), compared to pre-sound baseline, were used (paired t-test).  
642 For each animal, recordings at different locations were averaged. Additionally, only those animals  
643 that had a significant response to the post-gap BBN following a 100 ms gap were included in the  
644 analysis (100 ms window from the start of the post-gap BBN). Peri-stimulus time histograms  
645 (PSTH) were generated by adding spikes across trials in 1 ms bins over a 100 ms window (Figure  
646 5D). The pre-gap response (PSTH in a 100 ms window) was generated from all gap trials, since  
647 the pre-gap response should not be affected by the gap that follows it. For the post-gap responses  
648 (PSTH over 100 ms), each gap was treated separately. Comparisons between control and  
649 *Mbp<sup>shi/shi</sup>* and *Mbp<sup>neo/neo</sup>* mice revealed no significant differences in the amplitude of the pre-gap  
650 response (ANOVA,  $p=0.53$  and  $p=0.6$  respectively). Also, the peak of the post-gap response was  
651 used for group comparisons. Since some groups showed increased latencies, the PSTHs were  
652 centered at their peaks. An ANOVA was performed in a 21 ms window centered on the peak.

653  
654 For the analysis of the gap-detection vs baseline, a 50 ms window of baseline activity was  
655 compared to a 50 ms window of the post-gap response for each recording site using a paired t-  
656 test.

657  
658 **Gap pre-pulse inhibition of the acoustic startle reflex**

659 We used behavioral Gap-PPI to test behavioral temporal acuity<sup>67</sup>. This test was performed in  
660 *Mbp<sup>neo/neo</sup>*, *Mbp<sup>shi/+</sup>* and their control littermates. We used 9 control animals (wild types pulled  
661 together from both dysmyelination lines), 6 *Mbp<sup>neo/neo</sup>*, 6 *Mbp<sup>shi/+</sup>*. All mice were between 9 and 16  
662 weeks at the age of testing. For testing, a mouse was confined in a custom-made Plexiglas tunnel  
663 (12 cm long by 4 cm diameter), placed above a piezo element (TRU components, 800 Ohms  
664 impedance, 50 mm diameter, spanning 30V) (Figure S7A). The piezo was connected to a data  
665 acquisition system (NI SCB-68). Data acquisition (1 kHz sampling rate) was controlled with a  
666 custom-made code in a Matlab and sound delivery was done using pre-synthesized sound tracks  
667 in Matlab, played through VLC media player (Video Lan Organization).

668



669 Testing protocol was as summarized in Figure S7B. Mice were initially acclimatized to the setup  
670 for 10 min before the start of the experiment: 5 min. of silence followed by 5 min. of exposure to  
671 the background sound (BBN of 70 dB). Testing was then initiated. The startle noise was a BBN  
672 105 dB with 40 ms duration. It appeared every 10-20 s. at random times to avoid startle prediction.  
673 The startle could be preceded by a gap (0, 1, 2, 3, 5, 7, 10, 25 or 50 ms long) which ended 50 ms  
674 before the startle (Figure 6A). Gaps and startle had on/off ramps of 1 ms. The session started  
675 with 10 startle-only pulses, followed by gap preceded startle presentations (10 startle presentation  
676 per gap type). The experiment ended with five startle-only pulses, to assess habituation. The  
677 complete presentation of 105 trials had a duration of approximately 30 min.

678

679 *Gap-PPI* analysis was done as described before<sup>67</sup>, with mild modifications. The magnitude of the  
680 acoustic startle reflex (ASR) was measured as the maximal vertical force (peak-to-peak voltage  
681 output) exerted on the piezo element in a 500 ms window starting with the onset of the startle  
682 noise. Baseline activity (2 times the root mean square of the voltage trace in a 500 ms window  
683 before the startle noise) was subtracted. Startle and baseline amplitude were measured in  
684 arbitrary voltage units provided by the piezo measurement. Noisy trials (3 times the standard  
685 deviation of the root mean square of a 500 ms window before gap presentation) were discarded  
686 from the analysis. The percentage of pre-pulse inhibition for each gap and mouse was calculated  
687 following:

688 **Equation 2**

$$689 \quad PPI(\%) = 100 \frac{ASR - ASR_x}{ASR}$$

690 Where ASR is the startle response elicited at 0 ms gap, and ASR<sub>x</sub> is the startle response elicited  
691 per gap played. The data were fitted with a generalized logistic function:

692 **Equation 3**

$$693 \quad f = -\frac{a}{2} + \frac{a}{1 + \exp(b + c * x)}$$

694 Recordings with a fit coefficient ( $R^2$ ) below 0.6 were excluded from the analysis.

695

696 The gap detection threshold was considered as the value of the fitted curve that elicited  
697 50% of the maximal inhibition achieved per mouse. A second normalization was then made to the  
698 longest gap (50 ms) presumed to elicit the maximum value of inhibition (100%). For the statistical  
699 comparisons of the gap-detection threshold and amplitude of startle, parametric or non-parametric  
700 t-test were used. A 2-way ANOVA was performed for the comparison of the inhibition of the ASR  
701 along the different gap lengths.

## 702 **AudioBox**

703 The AudioBox system was used to test behavioral gap-detection. The AudioBox (*NewBehavior*,  
704 TSE systems) is an automated system for behavioral acoustic conditioning<sup>69-72</sup>. This system is  
705 designed to minimize the interference from the experimenter and provides a spatially and socially  
706 enriched environment in which female mice live in group (up to 10 mice) for several days. The  
707 setup consisted of a home-cage, where animals had food *ad-libitum*, and a corner within a sound-  
708 attenuated box, where they could access water also *ad-libitum* (Figure S7E). A speaker was over  
709 the corner (22TAF/G, Seas Prestige). Animals carried a transponder (implanted under  
710 anesthesia, see<sup>72</sup>) that was detected by an antenna at the entrance of the corner. Time spent in  
711 the corner, number of nose-pokes and sound played were detected through sensors in the corner.

712

713 For these experiments, *Mbp<sup>neo/neo</sup>* mice were chosen over *Mbp<sup>shi/shi</sup>* because of their normal life  
714 span and lack of motor impairments. Three experiment replications were pooled together. A final  
715 number of 7 control animals (Wt) and 13 mutant animals (*Mbp<sup>neo/neo</sup>*) that were 6-14 weeks old at  
716 the start of the experiment were used.

717 Behavioral testing occurred in the corner. Each time a mouse entered the corner a “visit” started,  
718 and a sound was played for the duration of the visit. The training paradigm, summarized in Figure  
719 S7F, consisted of 3 phases. During the habituation (one day doors opened, and 3-9 days doors  
720 closed), the safe sound (continuous BBN) was played in all visits. In this phase, animals could  
721 nose-poke and get access to water. During the conditioning phase ‘conditioned’ visits were  
722 introduced (Figure 6D and S7F). In safe visits, as before, the animal could make a nose-poke and  
723 get water. Animals that did not nose-poke in more than 60% of safe visits were immediately  
724 excluded from the behavioral experiment. This was the case for 11 out of a total of 18 Wt and 7  
725 out of 20 *Mbp<sup>neo/neo</sup>* tested. In conditioned visits (pseudo-randomly distributed according to  
726 probabilities as in Figure S7F), however, a conditioned sound (BBN interrupted by 50 ms silent  
727 gaps every 500 ms) was played, and a nose-poke triggered an air-puff, and no opening of the  
728 doors. Mice had to learn to not nose-poke in visits in which silent gaps interrupted the sound.  
729 Typically, this occurred 1-2 days after introduction of the conditioned visits. The percentage of  
730 conditioned sound presentation was increased stepwise 5% every 2 days. After the conditioning  
731 phase, the gap testing phase began. Every 4 days two new visit types were introduced, each with  
732 BBN sounds interrupted, like the conditioned sounds, by gaps, which varied in length with visit  
733 type (Figure 6D and S7F). During this phase 70% of visits were safe, 20% conditioned and 10%  
734 conditioned gaps. A total of 15 gaps were tested with lengths between 1 and 45 ms.

735 The new sounds were chosen in pairs in a semi-random fashion, such that the more difficult gaps  
736 (gaps below 5 ms) were presented in the same block of days as gaps longer than 5 ms. A  
737 minimum of four days with each pair of sounds was allowed before starting a new gap testing.

738

739 The percentage of avoidance was quantified as the number of visits without nose-pokes for each  
740 sound played, only considering the first two days of training for each sound. The number of visits  
741 was compared to ensure equivalent sound exposure. The data from visits with gaps between 2  
742 and 15 ms duration were used for statistical comparison.

743

#### 744 **Analysis generalities**

745 Analyses and figure outputs were always performed in a Matlab environment. All confidence  
746 intervals correspond to  $\alpha=0.05$ . Significance corresponds to <sup>n.s.</sup> $p>0.05$ ,  $*p\leq 0.05$ ,  $**p\leq 0.01$ ,  
747  $***p\leq 0.001$ ,  $****p\leq 0.0001$ . Statistical analysis was parametric or non-parametric according to the  
748 Shapiro-Wilcoxon normality test.

749

750 Paired comparisons were done using t-test or ranksum and post-hoc multiple comparisons  
751 were performed using 2-way ANOVA or Kruskal-Wallis.

752

753 **Acknowledgements**

754 The authors would like to thank Gerhard Hoch for the ABR amplifier and for technical support;  
755 Gudrun Fricke-Bode, Annette Fahrenholz, Saskia Heibeck, Uschi Müller, and Swati Subramanian  
756 for help with molecular and histological methods; Cornelia Casper for help with animal care; Chi  
757 Chen for assistance with the behavioral setups; Alexander Dieter for programming support; Jan  
758 Ficner for Figure 7 design; and Pierre Magistretti for providing MCT1 heterozygous mice. Funding  
759 was granted by the Max Planck Society and the cooperation program CONACyT-DAAD for S.M.  
760 (scholarship 381831), and an ERC Advanced Grant (K.A.N.). M.M. was funded through, K.A.N.  
761 and W.M. were supported by the Cluster of Excellence and DFG Research Center Nanoscale  
762 Microscopy and Molecular Physiology of the Brain.

763

764 **Author contributions**

765 Conceptualization, L.dH. and S.M.; electron microscopy images, T.R. and W.M.; ABR recordings  
766 of *Mbp<sup>neo/neo</sup>*, N.S.; ABR recordings, *in vivo* electrophysiology, and behavior, S.M.; *in vivo*  
767 electrophysiology for SSA, L.d.H.; generation, cellular and molecular characterization of the  
768 *Mbp<sup>neo/neo</sup>* model, W.M., and M.M.; AIS stainings and quantification, I.T., A.B., and M.K.; ON  
769 recordings, S.M., and A.T.; maintenance of MCT1 mice, K.K.; data analysis, S.M., and L.dH.; data  
770 curation, S.M.; writing-original draft, S.M., L.dH., and K.A.N; revision-editing, all authors; funding  
771 acquisition, S.M., L.dH., and K.A.N; project supervision, L.dH., and K.A.N.

772

773 **Declaration of interests**

774 The authors declare no competing interests.

775 **References**

- 776 1. Nave, K.-A. & Werner, H. B. Myelination of the nervous system: mechanisms and functions. *Annu.*  
777 *Rev. Cell Dev. Biol.* **30**, 503–533 (2014).
- 778 2. Fünfschilling, U. et al. Glycolytic oligodendrocytes maintain myelin and long-term axonal integrity.  
779 *Nature* **485**, 517–521 (2012).
- 780 3. Lee, Y. et al. Oligodendroglia metabolically support axons and contribute to neurodegeneration.  
781 *Nature* **487**, 443–448 (2012).
- 782 4. Saab, A. S. et al. Oligodendroglial NMDA receptors regulate glucose import and axonal energy  
783 metabolism. *Neuron* **91**, 119–132 (2016).
- 784 5. Trevisiol, A. et al. Monitoring ATP dynamics in electrically active white matter tracts. *Elife* **6**, (2017).
- 785 6. Nave, K.-A. & Ehrenreich, H. Myelination and oligodendrocyte functions in psychiatric diseases.  
786 *JAMA Psychiatry* **71**, 582–584 (2014).
- 787 7. Peters, A. The effects of normal aging on myelinated nerve fibers in monkey central nervous  
788 system. *Front. Neuroanat.* **3**, 11 (2009).
- 789 8. Peters, A., Sethares, C. & Killiany, R. J. Effects of age on the thickness of myelin sheaths in  
790 monkey primary visual cortex. *J. Comp. Neurol.* **435**, 241–248 (2001).
- 791 9. Stange-Marten, A. et al. Input timing for spatial processing is precisely tuned via constant synaptic  
792 delays and myelination patterns in the auditory brainstem. *Proc. Natl. Acad. Sci. USA* **114**, E4851–  
793 E4858 (2017).
- 794 10. Tomassy, G. S. et al. Distinct profiles of myelin distribution along single axons of pyramidal neurons  
795 in the neocortex. *Science* **344**, 319–324 (2014).
- 796 11. Gao, R. et al. Cortical column and whole-brain imaging with molecular contrast and nanoscale  
797 resolution. *Science* **363**, (2019).
- 798 12. Stedehouder, J., Brizee, D., Shpak, G. & Kushner, S. A. Activity-Dependent Myelination of  
799 Parvalbumin Interneurons Mediated by Axonal Morphological Plasticity. *J. Neurosci.* **38**, 3631–  
800 3642 (2018).
- 801 13. Micheva, K. D. et al. A large fraction of neocortical myelin ensheathes axons of local inhibitory  
802 neurons. *Elife* **5**, (2016).
- 803 14. Zonouzi, M. & Berger, D. Individual Oligodendrocytes Show Bias for Inhibitory Axons in the  
804 Neocortex.
- 805 15. Demerens, C. et al. Induction of myelination in the central nervous system by electrical activity.  
806 *Proc. Natl. Acad. Sci. USA* **93**, 9887–9892 (1996).
- 807 16. Yamazaki, Y. et al. Modulatory effects of oligodendrocytes on the conduction velocity of action  
808 potentials along axons in the alveus of the rat hippocampal CA1 region. *Neuron Glia Biol.* **3**, 325–  
809 334 (2007).

- 810 17. Gibson, E. M. et al. Neuronal activity promotes oligodendrogenesis and adaptive myelination in the  
811 mammalian brain. *Science* **344**, 1252304 (2014).
- 812 18. Hines, J. H., Ravanelli, A. M., Schwindt, R., Scott, E. K. & Appel, B. Neuronal activity biases axon  
813 selection for myelination in vivo. *Nat. Neurosci.* **18**, 683–689 (2015).
- 814 19. Mensch, S. et al. Synaptic vesicle release regulates myelin sheath number of individual  
815 oligodendrocytes in vivo. *Nat. Neurosci.* **18**, 628–630 (2015).
- 816 20. Seidl, A. H., Rubel, E. W. & Barría, A. Differential conduction velocity regulation in ipsilateral and  
817 contralateral collaterals innervating brainstem coincidence detector neurons. *J. Neurosci.* **34**,  
818 4914–4919 (2014).
- 819 21. Seidl, A. H. & Rubel, E. W. Systematic and differential myelination of axon collaterals in the  
820 mammalian auditory brainstem. *Glia* **64**, 487–494 (2016).
- 821 22. Leuzzi, V. et al. Ataxia, deafness, leukodystrophy: inherited disorder of the white matter in three  
822 related patients. *Neurology* **54**, 2325–2328 (2000).
- 823 23. Furst, M. & Levine, R. A. Hearing disorders in multiple sclerosis. *Handb Clin Neurol* **129**, 649–665  
824 (2015).
- 825 24. Papakonstantinou, A., Strelcyk, O. & Dau, T. Relations between perceptual measures of temporal  
826 processing, auditory-evoked brainstem responses and speech intelligibility in noise. *Hear. Res.*  
827 **280**, 30–37 (2011).
- 828 25. Shah, S. N. & Salamy, A. Auditory-evoked far-field potentials in myelin deficient mutant quaking  
829 mice. *Neuroscience* **5**, 2321–2323 (1980).
- 830 26. Naito, R., Murofushi, T., Mizutani, M. & Kaga, K. Auditory brainstem responses,  
831 electrocochleograms, and cochlear microphonics in the myelin deficient mutant hamster “bt”. *Hear.*  
832 *Res.* **136**, 44–48 (1999).
- 833 27. Ito, T., Tokuriki, M., Shibamori, Y., Saito, T. & Nojyo, Y. Cochlear nerve demyelination causes  
834 prolongation of wave I latency in ABR of the myelin deficient (md) rat. *Hear. Res.* **191**, 119–124  
835 (2004).
- 836 28. Kim, J. H., Renden, R. & von Gersdorff, H. Dysmyelination of auditory afferent axons increases the  
837 jitter of action potential timing during high-frequency firing. *J. Neurosci.* **33**, 9402–9407 (2013).
- 838 29. Roncagliolo, M., Benítez, J. & Eguibar, J. R. Progressive deterioration of central components of  
839 auditory brainstem responses during postnatal development of the myelin mutant taiep rat. *Audiol*  
840 *Neurootol* **5**, 267–275 (2000).
- 841 30. Carpinelli, M. R. et al. A new mouse model of Canavan leukodystrophy displays hearing  
842 impairment due to central nervous system dysmyelination. *Dis. Model. Mech.* (2014).  
843 doi:10.1242/dmm.014605
- 844 31. Kanzaki, J., Mikoshiba, K. & Tsukada, Y. Auditory brain stem response in neuropathological mutant  
845 mice (shiverer and reeler). *ORL. J. Otorhinolaryngol. Relat. Spec.* **47**, 294–298 (1985).

- 846 32. Roach, A., Boylan, K., Horvath, S., Prusiner, S. B. & Hood, L. E. Characterization of cloned cDNA  
847 representing rat myelin basic protein: absence of expression in brain of shiverer mutant mice. *Cell*  
848 **34**, 799–806 (1983).
- 849 33. Boggs, J. M. Myelin basic protein: a multifunctional protein. *Cell Mol. Life Sci.* **63**, 1945–1961  
850 (2006).
- 851 34. Nawaz, S. et al. Actin filament turnover drives leading edge growth during myelin sheath formation  
852 in the central nervous system. *Dev. Cell* **34**, 139–151 (2015).
- 853 35. Rosenbluth, J. Central myelin in the mouse mutant shiverer. *J. Comp. Neurol.* **194**, 639–648  
854 (1980).
- 855 36. Poggi, G. et al. Cortical network dysfunction caused by a subtle defect of myelination. *Glia* **64**,  
856 2025–2040 (2016).
- 857 37. Readhead, C. et al. Expression of a myelin basic protein gene in transgenic shiverer mice:  
858 correction of the dysmyelinating phenotype. *Cell* **48**, 703–712 (1987).
- 859 38. Shine, H. D., Readhead, C., Popko, B., Hood, L. & Sidman, R. L. Morphometric analysis of normal,  
860 mutant, and transgenic CNS: correlation of myelin basic protein expression to myelinogenesis. *J.*  
861 *Neurochem.* **58**, 342–349 (1992).
- 862 39. Miller, D. J., Lackey, E. P., Hackett, T. A. & Kaas, J. H. Development of myelination and cholinergic  
863 innervation in the central auditory system of a prosimian primate (*Otolemur garnetti*). *J. Comp.*  
864 *Neurol.* **521**, 3804–3816 (2013).
- 865 40. Wang, J. et al. Myelination of the postnatal mouse cochlear nerve at the peripheral-central nervous  
866 system transitional zone. *Front. Pediatr.* **1**, 43 (2013).
- 867 41. Bakay, W. M. H., Anderson, L. A., Garcia-Lazaro, J. A., McAlpine, D. & Schaette, R. Hidden  
868 hearing loss selectively impairs neural adaptation to loud sound environments. *Nat. Commun.* **9**,  
869 4298 (2018).
- 870 42. Buran, B. N. et al. Onset coding is degraded in auditory nerve fibers from mutant mice lacking  
871 synaptic ribbons. *J. Neurosci.* **30**, 7587–7597 (2010).
- 872 43. Moser, T. & Starr, A. Auditory neuropathy--neural and synaptic mechanisms. *Nat. Rev. Neurol.* **12**,  
873 135–149 (2016).
- 874 44. Sergeyenko, Y., Lall, K., Liberman, M. C. & Kujawa, S. G. Age-related cochlear synaptopathy: an  
875 early-onset contributor to auditory functional decline. *J. Neurosci.* **33**, 13686–13694 (2013).
- 876 45. Strenzke, N. et al. Hair cell synaptic dysfunction, auditory fatigue and thermal sensitivity in otoferlin  
877 *Ile515Thr* mutants. *EMBO J.* **35**, 2519–2535 (2016).
- 878 46. Wan, G. & Corfas, G. Transient auditory nerve demyelination as a new mechanism for hidden  
879 hearing loss. *Nat. Commun.* **8**, 14487 (2017).
- 880 47. Hamada, M. S. & Kole, M. H. P. Myelin loss and axonal ion channel adaptations associated with  
881 gray matter neuronal hyperexcitability. *J. Neurosci.* **35**, 7272–7286 (2015).



- 882 48. Kuba, H., Oichi, Y. & Ohmori, H. Presynaptic activity regulates Na(+) channel distribution at the  
883 axon initial segment. *Nature* **465**, 1075–1078 (2010).
- 884 49. Susuki, K. & Kuba, H. Activity-dependent regulation of excitable axonal domains. *J Physiol Sci* **66**,  
885 99–104 (2016).
- 886 50. Wu, G. K., Arbuckle, R., Liu, B.-H., Tao, H. W. & Zhang, L. I. Lateral sharpening of cortical  
887 frequency tuning by approximately balanced inhibition. *Neuron* **58**, 132–143 (2008).
- 888 51. Khouri, L. & Nelken, I. Detecting the unexpected. *Curr. Opin. Neurobiol.* **35**, 142–147 (2015).
- 889 52. Ayala, Y. A. & Malmierca, M. S. Stimulus-specific adaptation and deviance detection in the inferior  
890 colliculus. *Front. Neural Circuits* **6**, 89 (2012).
- 891 53. Pérez-González, D. & Malmierca, M. S. Adaptation in the auditory system: an overview. *Front*  
892 *Integr Neurosci* **8**, 19 (2014).
- 893 54. Anderson, L. A. & Linden, J. F. Mind the gap: two dissociable mechanisms of temporal processing  
894 in the auditory system. *J. Neurosci.* **36**, 1977–1995 (2016).
- 895 55. Harris, K. C., Wilson, S., Eckert, M. A. & Dubno, J. R. Human evoked cortical activity to silent gaps  
896 in noise: ' effects of age, attention, and cortical processing speed. *Ear Hear.* **33**, 330–339 (2012).
- 897 56. Fournier, P. & Hébert, S. Gap detection deficits in humans with tinnitus as assessed with the  
898 acoustic startle paradigm: does tinnitus fill in the gap? *Hear. Res.* **295**, 16–23 (2013).
- 899 57. Joris, P. X., Schreiner, C. E. & Rees, A. Neural processing of amplitude-modulated sounds.  
900 *Physiol. Rev.* **84**, 541–577 (2004).
- 901 58. Sinha, K., Karimi-Abdolrezaee, S., Velumian, A. A. & Fehlings, M. G. Functional changes in  
902 genetically dysmyelinated spinal cord axons of shiverer mice: role of juxtaparanodal Kv1 family K+  
903 channels. *J. Neurophysiol.* **95**, 1683–1695 (2006).
- 904 59. Battfeld, A., Tran, B. T., Gavrillis, J., Cooper, E. C. & Kole, M. H. P. Heteromeric Kv7.2/7.3  
905 channels differentially regulate action potential initiation and conduction in neocortical myelinated  
906 axons. *J. Neurosci.* **34**, 3719–3732 (2014).
- 907 60. Stys, P. K., Ransom, B. R. & Waxman, S. G. Compound action potential of nerve recorded by  
908 suction electrode: a theoretical and experimental analysis. *Brain Res.* **546**, 18–32 (1991).
- 909 61. Shinn, J. B., Chermak, G. D. & Musiek, F. E. GIN (Gaps-In-Noise) Performance in the Pediatric  
910 Population. *J Am Acad Audiol* **20**, 229–238 (2009).
- 911 62. Clark, M. G., Sherman, G. F., Bimonte, H. A. & Fitch, R. H. Perceptual auditory gap detection  
912 deficits in male BXSB mice with cerebrocortical ectopias. *Neuroreport* **11**, 693–696 (2000).
- 913 63. Dehmel, S., Eisinger, D. & Shore, S. E. Gap prepulse inhibition and auditory brainstem-evoked  
914 potentials as objective measures for tinnitus in guinea pigs. *Front. Syst. Neurosci.* **6**, 42 (2012).
- 915 64. Friedman, J. T., Peiffer, A. M., Clark, M. G., Benasich, A. A. & Fitch, R. H. Age and experience-  
916 related improvements in gap detection in the rat. *Brain Res. Dev. Brain Res.* **152**, 83–91 (2004).

- 917 65. Moreno-Paulete, R., Canlon, B. & Cederroth, C. R. Differential Neural Responses Underlying the  
918 Inhibition of the Startle Response by Pre-Pulses or Gaps in Mice. *Front. Cell Neurosci.* **11**, 19  
919 (2017).
- 920 66. Koch, M. The neurobiology of startle. *Prog. Neurobiol.* **59**, 107–128 (1999).
- 921 67. Popelář, J. et al. The absence of brain-specific link protein *Bral2* in perineuronal nets hampers  
922 auditory temporal resolution and neural adaptation in mice. *Physiol. Res.* **66**, 867–880 (2017).
- 923 68. Walton, J. P., Frisina, R. D., Ison, J. R. & O'Neill, W. E. Neural correlates of behavioral gap  
924 detection in the inferior colliculus of the young CBA mouse. *J. Comp. Physiol. A* **181**, 161–176  
925 (1997).
- 926 69. de Hoz, L. & Nelken, I. Frequency tuning in the behaving mouse: different bandwidths for  
927 discrimination and generalization. *PLoS One* **9**, e91676 (2014).
- 928 70. de Hoz, L. et al. Blocking *c-Fos* Expression Reveals the Role of Auditory Cortex Plasticity in Sound  
929 Frequency Discrimination Learning. *Cereb. Cortex* **28**, 1645–1655 (2018).
- 930 71. Brzózka, M. M., Rossner, M. J. & de Hoz, L. *Tcf4* transgenic female mice display delayed  
931 adaptation in an auditory latent inhibition paradigm. *Eur Arch Psychiatry Clin Neurosci* **266**, 505–  
932 512 (2016).
- 933 72. Cruces-Solís, H. et al. Auditory midbrain coding of statistical learning that results from  
934 discontinuous sensory stimulation. *PLoS Biol.* **16**, e2005114 (2018).
- 935 73. Chen, C., Krueger-Burg, D. & de Hoz, L. Wide sensory filters underlie performance in memory-  
936 based discrimination and generalization. *PLoS One* (2019).
- 937 74. Clarkson, C., Antunes, F. M. & Rubio, M. E. Conductive Hearing Loss Has Long-Lasting Structural  
938 and Molecular Effects on Presynaptic and Postsynaptic Structures of Auditory Nerve Synapses in  
939 the Cochlear Nucleus. *J. Neurosci.* **36**, 10214–10227 (2016).
- 940 75. Lasiene, J., Matsui, A., Sawa, Y., Wong, F. & Horner, P. J. Age-related myelin dynamics revealed  
941 by increased oligodendrogenesis and short internodes. *Aging Cell* **8**, 201–213 (2009).
- 942 76. Sinclair, J. L. et al. Sound-Evoked Activity Influences Myelination of Brainstem Axons in the  
943 Trapezoid Body. *J. Neurosci.* **37**, 8239–8255 (2017).
- 944 77. Xing, Y. et al. Age-related changes of myelin basic protein in mouse and human auditory nerve.  
945 *PLoS One* **7**, e34500 (2012).
- 946 78. Chiappa, K. H., Harrison, J. L., Brooks, E. B. & Young, R. R. Brainstem auditory evoked responses  
947 in 200 patients with multiple sclerosis. *Ann. Neurol.* **7**, 135–143 (1980).
- 948 79. Amaral, M. I. R. do & Colella-Santos, M. F. Temporal resolution: performance of school-aged  
949 children in the GIN - Gaps-in-noise test. *Braz J Otorhinolaryngol* **76**, 745–752 (2010).
- 950 80. Delgutte, B. & Kiang, N. Y. S. Speech coding in the auditory nerve: IV. Sounds with consonant-like  
951 dynamic characteristics. *J. Acoust. Soc. Am.* **75**, 897–907 (1984).
- 952 81. Sinex, D. G., McDonald, L. P. & Mott, J. B. Neural correlates of nonmonotonic temporal acuity for  
953 voice onset time. *J. Acoust. Soc. Am.* **90**, 2441–2449 (1991).

- 954 82. Noebels, J. L., Marcom, P. K. & Jalilian-Tehrani, M. H. Sodium channel density in hypomyelinated  
955 brain increased by myelin basic protein gene deletion. *Nature* **352**, 431–434 (1991).
- 956 83. Westenbroek, R. E., Noebels, J. L. & Catterall, W. A. Elevated expression of type II Na<sup>+</sup> channels  
957 in hypomyelinated axons of shiverer mouse brain. *J. Neurosci.* **12**, 2259–2267 (1992).
- 958 84. Boiko, T. et al. Compact myelin dictates the differential targeting of two sodium channel isoforms in  
959 the same axon. *Neuron* **30**, 91–104 (2001).
- 960 85. Van Wart, A. & Matthews, G. Expression of sodium channels Nav1.2 and Nav1.6 during postnatal  
961 development of the retina. *Neurosci. Lett.* **403**, 315–317 (2006).
- 962 86. Van Wart, A. & Matthews, G. Impaired firing and cell-specific compensation in neurons lacking  
963 nav1.6 sodium channels. *J. Neurosci.* **26**, 7172–7180 (2006).
- 964 87. Rasband, M. N., Trimmer, J. S., Peles, E., Levinson, S. R. & Shrager, P. K<sup>+</sup> channel distribution  
965 and clustering in developing and hypomyelinated axons of the optic nerve. *J Neurocytol* **28**, 319–  
966 331 (1999).
- 967 88. Wang, H., Allen, M. L., Grigg, J. J., Noebels, J. L. & Tempel, B. L. Hypomyelination alters K<sup>+</sup>  
968 channel expression in mouse mutants shiverer and Trembler. *Neuron* **15**, 1337–1347 (1995).
- 969 89. Stathopoulos, P., Alexopoulos, H. & Dalakas, M. C. Autoimmune antigenic targets at the node of  
970 Ranvier in demyelinating disorders. *Nat. Rev. Neurol.* **11**, 143–156 (2015).
- 971 90. Battfeld, A., Klooster, J. & Kole, M. H. P. Myelinating satellite oligodendrocytes are integrated in a  
972 glial syncytium constraining neuronal high-frequency activity. *Nat. Commun.* **7**, 11298 (2016).
- 973 91. Jensen, H. B., Ravnborg, M., Dalgas, U. & Stenager, E. 4-Aminopyridine for symptomatic treatment  
974 of multiple sclerosis: a systematic review. *Ther Adv Neurol Disord* **7**, 97–113 (2014).
- 975 92. Trapp, B. D. & Stys, P. K. Virtual hypoxia and chronic necrosis of demyelinated axons in multiple  
976 sclerosis. *Lancet Neurol.* **8**, 280–291 (2009).
- 977 93. Shailer, M. J. & Moore, B. C. Gap detection as a function of frequency, bandwidth, and level. *J.*  
978 *Acoust. Soc. Am.* **74**, 467–473 (1983).
- 979 94. Leitner, D. S. et al. Parameters affecting gap detection in the rat. *Percept. Psychophys.* **54**, 395–  
980 405 (1993).
- 981 95. Weible, A. P., Liu, C., Niell, C. M. & Wehr, M. Auditory cortex is required for fear potentiation of gap  
982 detection. *J. Neurosci.* **34**, 15437–15445 (2014).
- 983 96. Weible, A. P. et al. Perceptual gap detection is mediated by gap termination responses in auditory  
984 cortex. *Curr. Biol.* **24**, 1447–1455 (2014).
- 985 97. Hoover, E., Pasquesi, L. & Souza, P. Comparison of clinical and traditional gap detection tests. *J*  
986 *Am Acad Audiol* **26**, 540–546 (2015).
- 987 98. Phillips, D. P. Auditory gap detection, perceptual channels, and temporal resolution in speech  
988 perception. *J Am Acad Audiol* **10**, 343–354 (1999).

- 989 99. Moshitch, D., Las, L., Ulanovsky, N., Bar-Yosef, O. & Nelken, I. Responses of neurons in primary  
990 auditory cortex (A1) to pure tones in the halothane-anesthetized cat. *J. Neurophysiol.* **95**, 3756–  
991 3769 (2006).
- 992 100. Monje, M. Myelin plasticity and nervous system function. *Annu. Rev. Neurosci.* **41**, 61–76 (2018).
- 993 101. Werner, H. B. et al. A critical role for the cholesterol-associated proteolipids PLP and M6B in  
994 myelination of the central nervous system. *Glia* **61**, 567–586 (2013).
- 995 102. Jung, S. et al. Disruption of adaptor protein 2 $\mu$  (AP-2 $\mu$ ) in cochlear hair cells impairs vesicle  
996 reloading of synaptic release sites and hearing. *EMBO J.* **34**, 2686–2702 (2015).
- 997 103. Weil, M.-T., Ruhwedel, T., Meschkat, M., Sadowski, B. & Möbius, W. Transmission electron  
998 microscopy of oligodendrocytes and myelin. *Methods Mol. Biol.* **1936**, 343–375 (2019).
- 999 104. Hackett, T. A., Barkat, T. R., O'Brien, B. M. J., Hensch, T. K. & Polley, D. B. Linking topography to  
1000 tonotopy in the mouse auditory thalamocortical circuit. *J. Neurosci.* **31**, 2983–2995 (2011).
- 1001 105. Ashida, G., Wagner, H. & Carr, C. E. in *Analysis of parallel spike trains* (eds. Grün, S. & Rotter, S.)  
1002 59–74 (Springer US, 2010). doi:10.1007/978-1-4419-5675-0\_4
- 1003

## Figure 1

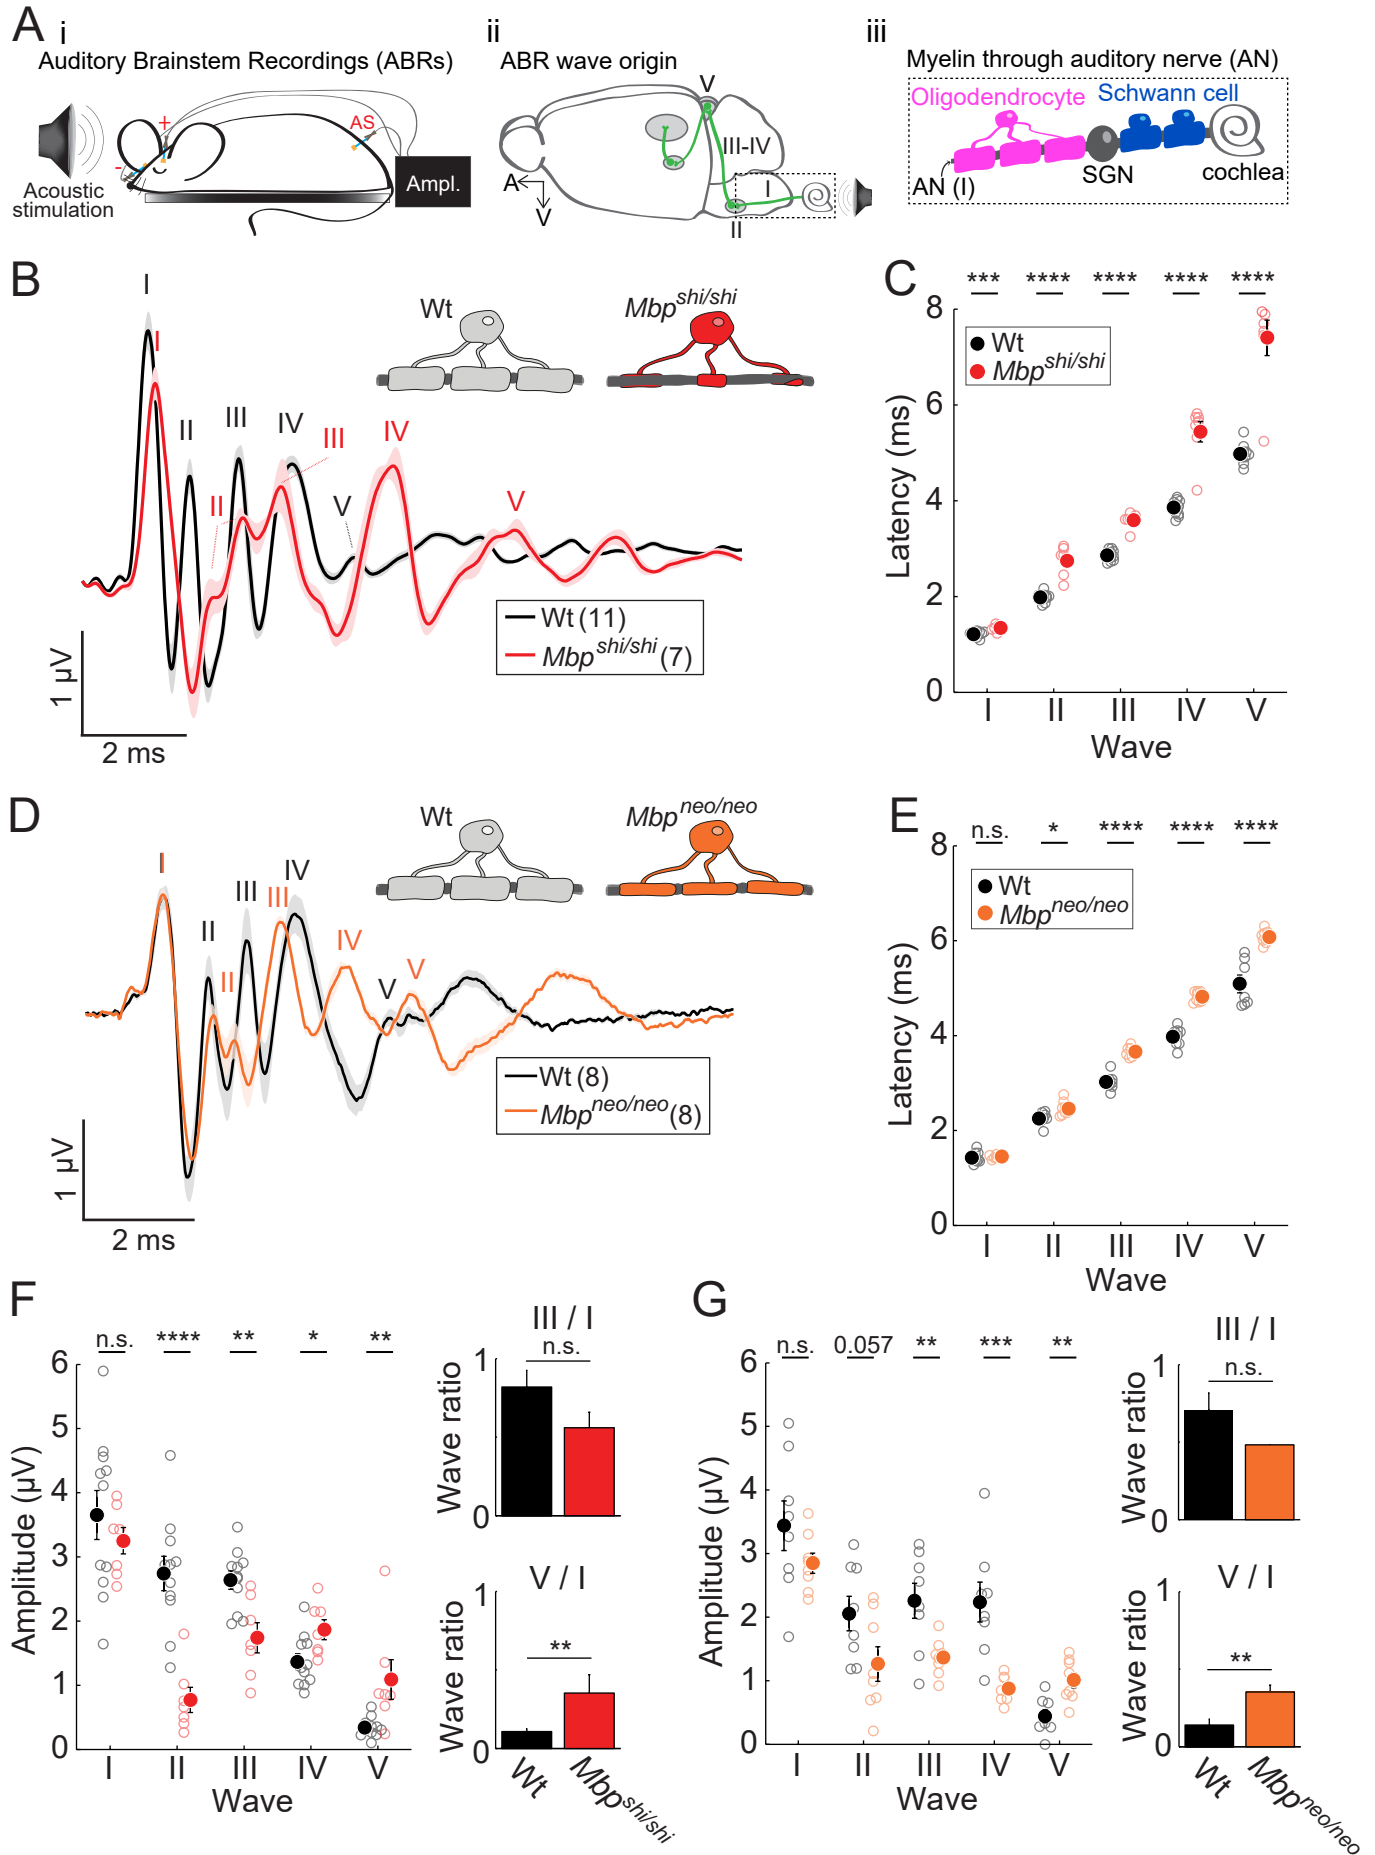

**Figure 1. Central dysmyelination causes evoked-response delays and gain changes.**

**A)** Left (i): Schematic of auditory brainstem (ABR) scalp recordings in mice. Middle (ii): structures in the auditory circuit contributing to ABRs (I to V). Right (iii): scheme of peripheral (around the spiral ganglion neurons, SGN) and central myelination of auditory nerve (AN). **B)** Group mean traces in control (black; n=11; 7 *Mbp*<sup>+/+</sup> and 4 *Mbp*<sup>shi/+</sup> without significant differences in ABR measurements (80 dB), see table in Figure S2D) and *Mbp*<sup>shi/shi</sup> (red; n=7) mice. Each one of the 5 peaks (I–V) can be attributed to activity at a different station along the auditory brainstem (see schematic in Aii). Responses in *Mbp*<sup>shi/shi</sup> mice were delayed at all auditory stations. Wave II appears divided and merged with wave III. **C)** The quantification of the peak latencies reveals a progressively larger difference in latency from wave I (p=0.001) to wave V (p<0.0001 for waves II–V). **D)** Same as A) but for *Mbp*<sup>neo/neo</sup> mice (orange; n = 8) and Wt (black; n=8). Wave II appears divided. **E)** Latency quantification again showed progressively larger latency differences from wave I to wave V (p=0.74, p=0.013, p<0.0001, p<0.0001, p=0.0001; waves I–V, respectively). **F)** Wave amplitude quantification. In *Mbp*<sup>shi/shi</sup> mice (red), waves II and III amplitudes were reduced, while those of waves IV and V were increased (p=0.44, p<0.0001, p=0.0031, p=0.022, p=0.008; waves I to V respectively), suggesting a compensatory central gain increase. Auditory gain was quantified by the amplitude ratio in waves III/I (upper right graph), which was comparable across groups (p=0.085), and waves V/I (lower right graph), which was significantly increased in mutants (p=0.006). **G)** Same as E) but for *Mbp*<sup>neo/neo</sup> mice. As in *Mbp*<sup>shi/shi</sup> mice, amplitude changes were seen at the central level (p=0.18, p=0.057, p=0.009, p=0.0008, p=0.003; waves I to V respectively). An increase in central gain was observed in *Mbp*<sup>neo/neo</sup> for wave V (lower right graph; p=0.009) but no changes in the gain of wave III (upper right graph; p=0.083). All graphs depict the mean and S.E.M. (error bar or a shaded area).



## Figure 2

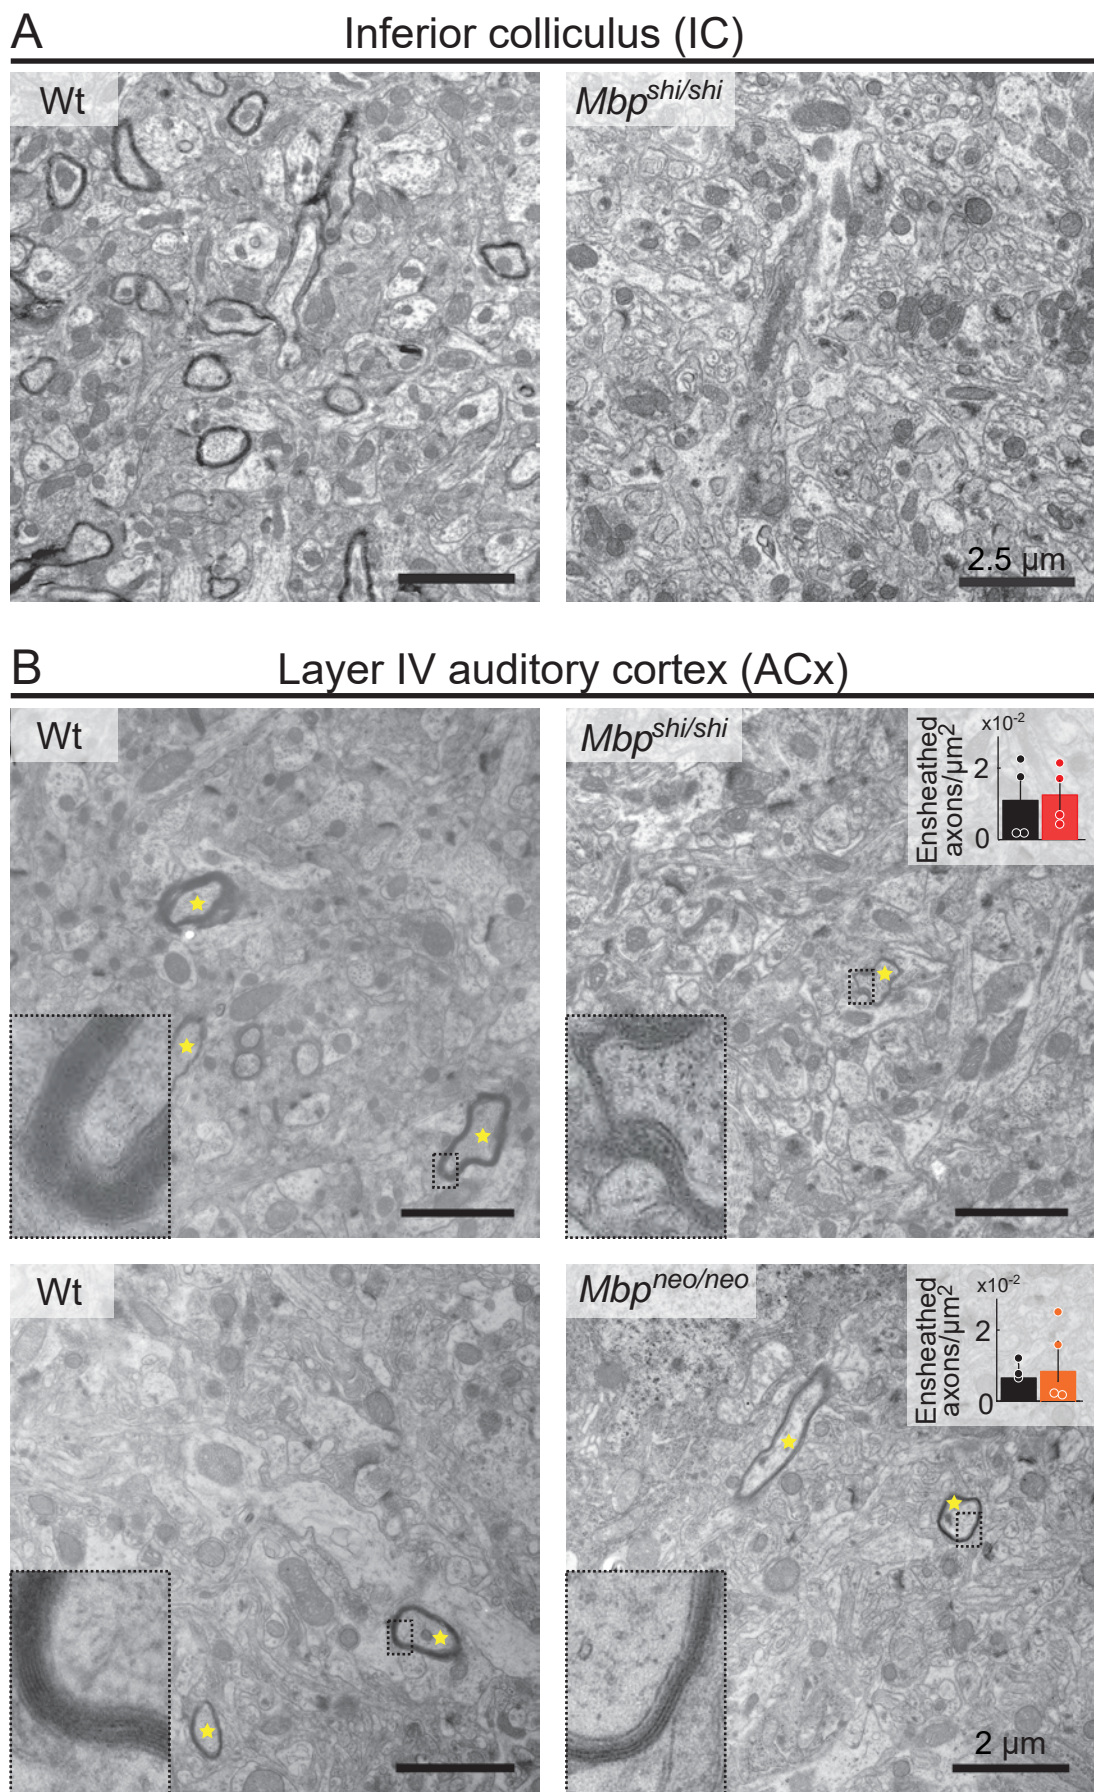



**Figure 2. Ensheathment profiles along the auditory system in normal and dysmyelinated models.**

**A)** Electron microscopy images of the inferior colliculus of a Wt mouse (left panel) showing sparse compact myelin, and an *Mbp<sup>shi/shi</sup>* mouse (right panel), lacking electro-dense compact myelin. **B)** Electron microscopy images of the auditory cortex of Wt and *Mbp<sup>shi/shi</sup>* (upper panel) and Wt and *Mbp<sup>neo/neo</sup>* mouse (lower panel). Ensheathed axons in the ACx are marked with yellow asterisks. Insets show details of the myelin sheath of axons from the respective image. *Mbp<sup>shi/shi</sup>* axons (upper right) show lack of compact myelin, while *Mbp<sup>neo/neo</sup>* axons (lower right) show thinner compact myelin than Wts. Inset plots show the quantification of the number of ensheathed axons (compact or not compact myelin) per area in *Mbp<sup>shi/shi</sup>* (left, red, n=4), *Mbp<sup>neo/neo</sup>* (right, orange, n=4), and their respective Wts (black, n=3-4). There was no difference between Wt and either mutant model ( $p=0.83$  and  $p=0.73$  for *Mbp<sup>shi/shi</sup>* and *Mbp<sup>neo/neo</sup>* respectively). Bar graphs show the mean of all animals quantified (10-15 images per mouse). Scale bars: 2.5  $\mu\text{m}$  (A), 2  $\mu\text{m}$  (B).

## Figure 3

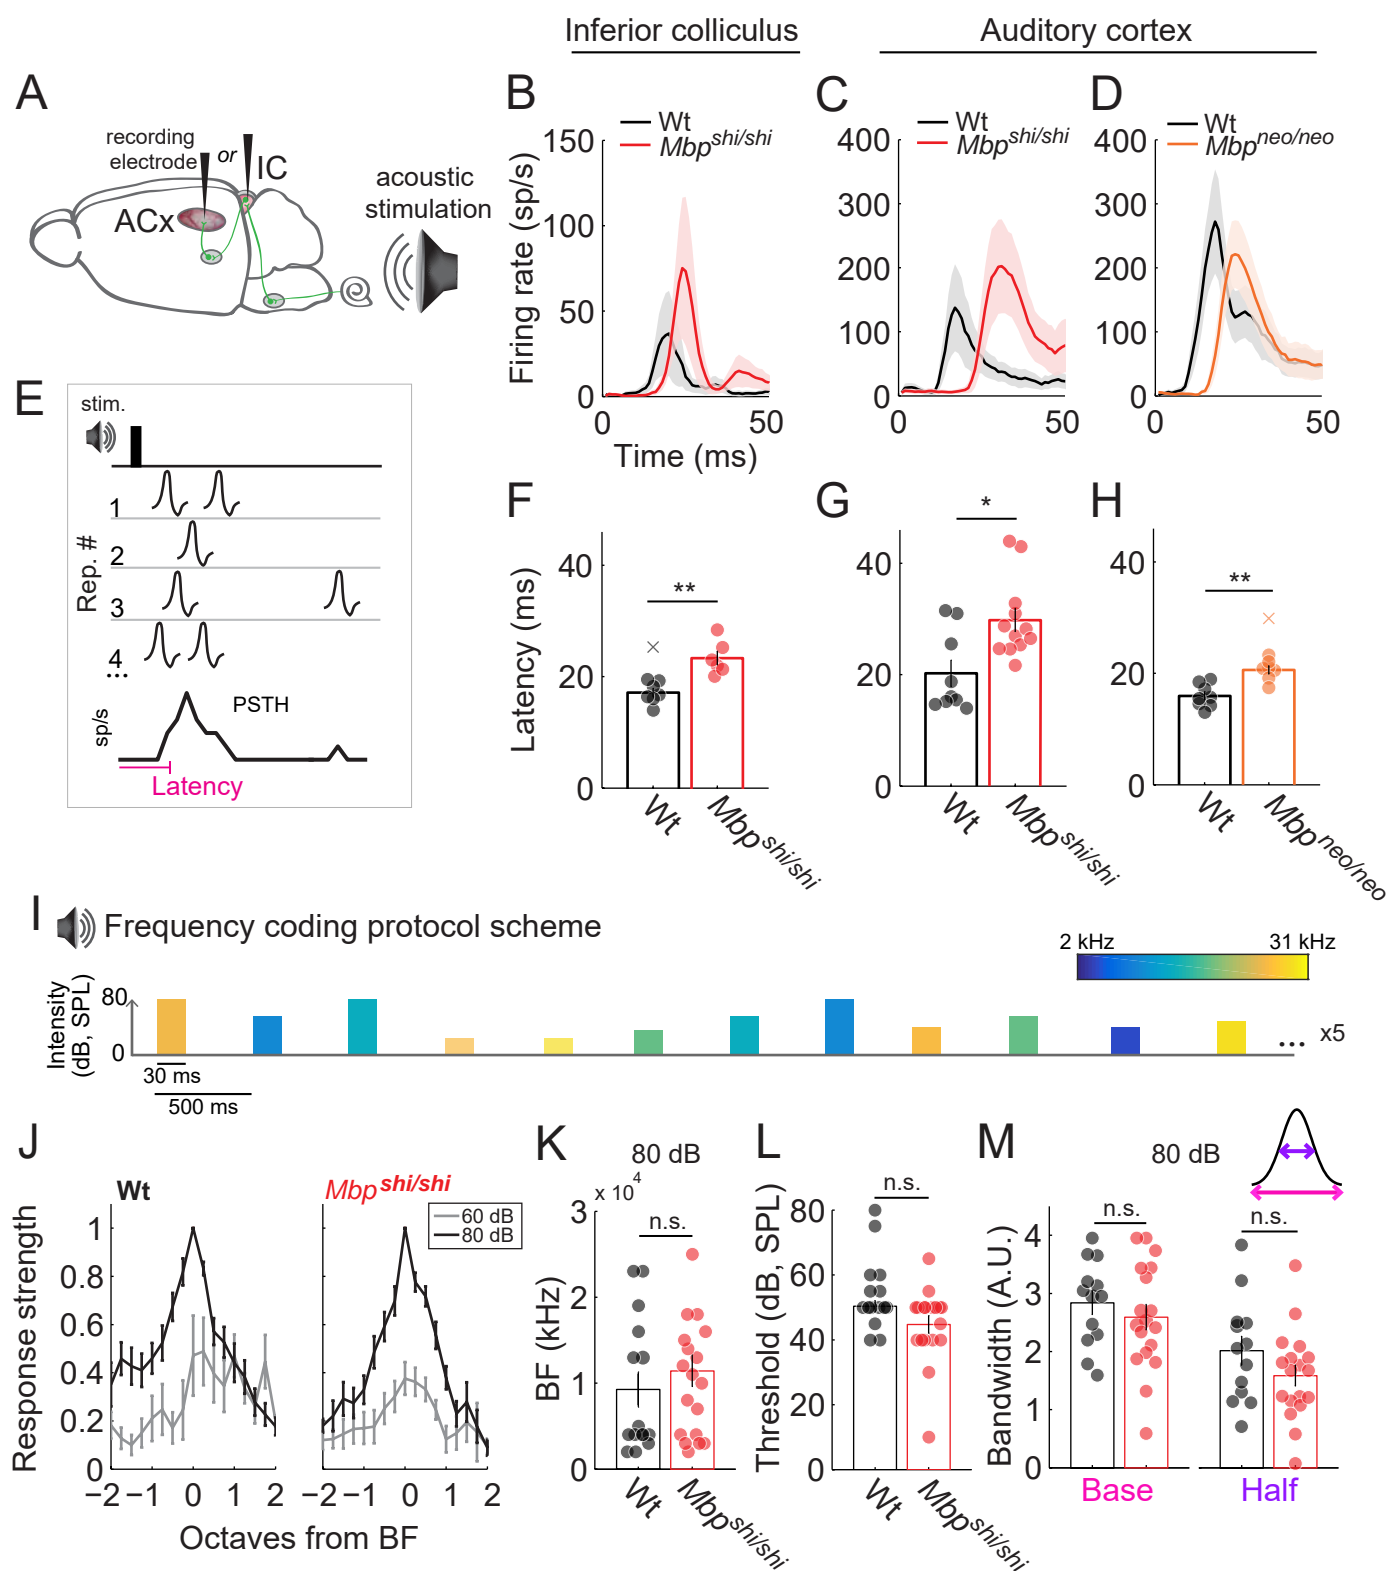

**Figure 3. Responses to single sound-stimuli in IC and ACx of dysmyelinated models are abnormal only in latency.**

**A)** Schematic brain depicting auditory areas (ACx and IC) where multi-unit recordings took place. **B)** Peri-stimulus time histogram (PSTH) of responses to a click sound recorded in the IC for Wt (black; n=6-8) and *Mbp<sup>shi/shi</sup>* (red; n=6-8) mice aligned at time of click presentation (0 ms). Responses of *Mbp<sup>shi/shi</sup>* are delayed with respect to Wt. **C)** Same as B) but for ACx recordings. A stronger delay in *Mbp<sup>shi/shi</sup>* (red; n=12-13) compared to Wt (black; n=7-10) is observed in this case. **D)** Same as C) but for *Mbp<sup>neo/neo</sup>* mice (orange; n=7-8) and corresponding Wt (black; n=8). A smaller shift in latency in the ACx of *Mbp<sup>neo/neo</sup>* is observed, compared to *Mbp<sup>shi/shi</sup>* mice. **E)** Scheme of latency measurement: time at which the PSTH, sum of spikes across 10 trials in 1 ms time windows, surpassed 1.5 times the baseline activity. A significant latency increase is seen in *Mbp<sup>shi/shi</sup>* animals compared to Wt. **F)** in the IC (p=0.0012) and **G)** in the ACx (p=0.023). **H)** *Mbp<sup>neo/neo</sup>* mice also showed a significant increase in response latency in the ACx (p=0.0012). **I)** Schematic of the tone sweep protocol used to test tuning. A series of 24, 30 ms long, tones (2-31 kHz) were played at different intensities. 10 repetitions (Rep.) of each tone-intensity combination were presented in a random order. **J-M)** Basic tuning properties are not affected with dysmyelination. n=13 recordings of 10 wild type mice. n=18 recordings of 15 *Mbp<sup>shi/shi</sup>* mice. **J)** Normalized tuning curves for wild type (left) and *Mbp<sup>shi/shi</sup>* mice show response selectivity in octaves from best frequency (BF) at 60 (gray) and 80 dB (black). **K)** Recordings from comparable rostro-caudal locations yielded comparable BFs at 80 dB (p=0.51) in wild type and *Mbp<sup>shi/shi</sup>* mice indicating no major change in tonotopic map. **L)** Auditory cortical thresholds were similar between groups (p=0.11). **M)** Bandwidth of tuning was also similar between groups (p=0.56 and p=0.21 for base and half bandwidth respectively).

## Figure 4

**A**

Temporal reliability protocol scheme

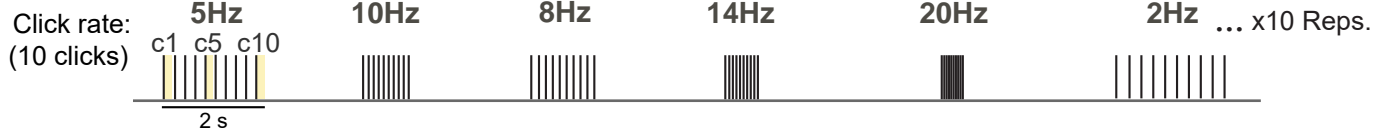

**B**

Individual examples (5Hz)

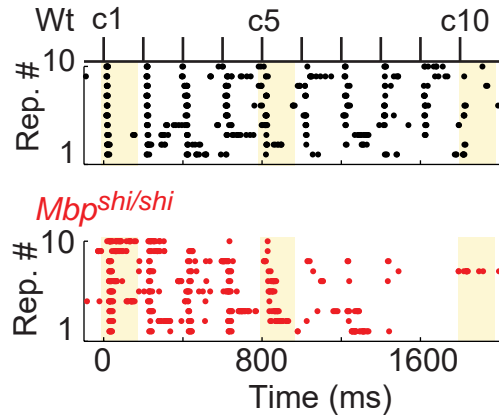

**C**

Mean animals (5Hz)

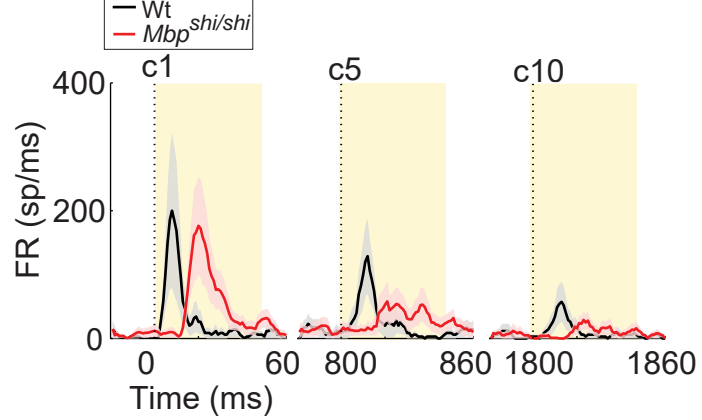

**D**

Individual examples

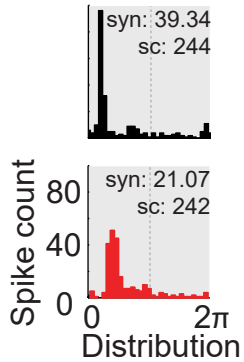

**E**

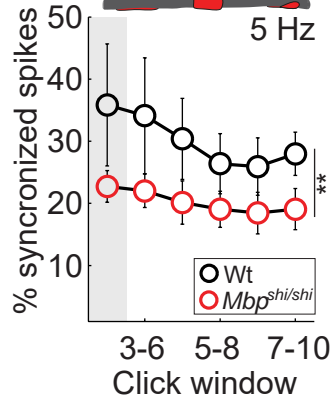

**F**

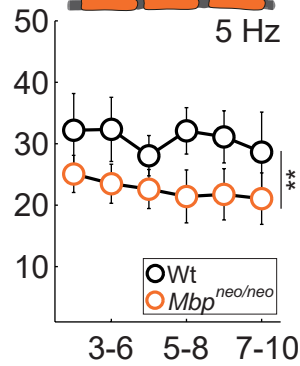

**G**

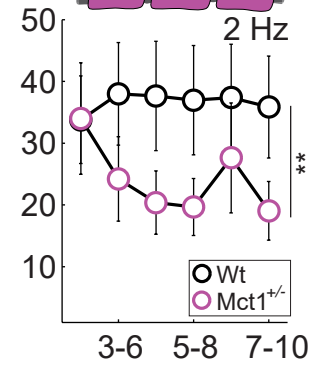

**Figure 4. Temporal reliability is affected in mice with either dysmyelination or a reduction in axo-glial metabolic support.**

**A)** Schematic of the click rate-tracing protocol used to test temporal reliability. Blocks of 10 clicks are played at different rates in random order. Each rate is repeated 10 times. Analysis in C) focuses on click 1, 5 and 10 (c1, c5 and c10). **B)** Example raster plot of ACx responses (each dot represents 1 spike) to 10 clicks at 5 Hz across the 10 stimulus repetitions in a Wt (upper, black) and an *Mbp<sup>shi/shi</sup>* mouse (lower, red). *Mbp<sup>shi/shi</sup>* animals show a steeper decay on spiking activity across clicks compared to Wt. **C)** Mean PSTH of responses to click 1, 5 and 10, at 5 Hz for Wt (black; n=10) and *Mbp<sup>shi/shi</sup>* (red; n=13) animals. The thick line shows the mean of all recorded animals and the shaded area depicts the S.E.M. Click time is indicated by dashed lines. While responses to the first click are similar in amplitude in Wt and *Mbp<sup>shi/shi</sup>* animals (with the expected delay in *Mbp<sup>shi/shi</sup>*), a strong reduction of response strength is seen in *Mbp<sup>shi/shi</sup>* mice with increasing clicks. **D)** Individual examples of spike synchrony plots for Wt (top) and *Mbp<sup>shi/shi</sup>* (bottom) were taken from the first click window (clicks 2-5, depicted by a gray square in E). **E)** Quantification of spike synchrony in sliding windows of 4 clicks (clicks 2-5, 3-6, 4-7, 5-8, 6-9 and 7-10). Onset responses of click 1 were not used. Leftmost: significant reduction in spike synchrony between *Mbp<sup>shi/shi</sup>* mice (red, n=6-9) and Wt (black, n= 3-6 mice) at 5 Hz (p=0.0021). Middle: significant reduction also seen between *Mbp<sup>neo/neo</sup>* mice (orange, n=5-8 mice), and Wt (black, n=3-8 mice) at 5 Hz (p=0.0014). Right: significant difference between MCT1<sup>+/-</sup> mice (purple, n=5-6 mice), and Wt (black, n=8 mice) at 2 Hz (p=0.011).

## Figure 5

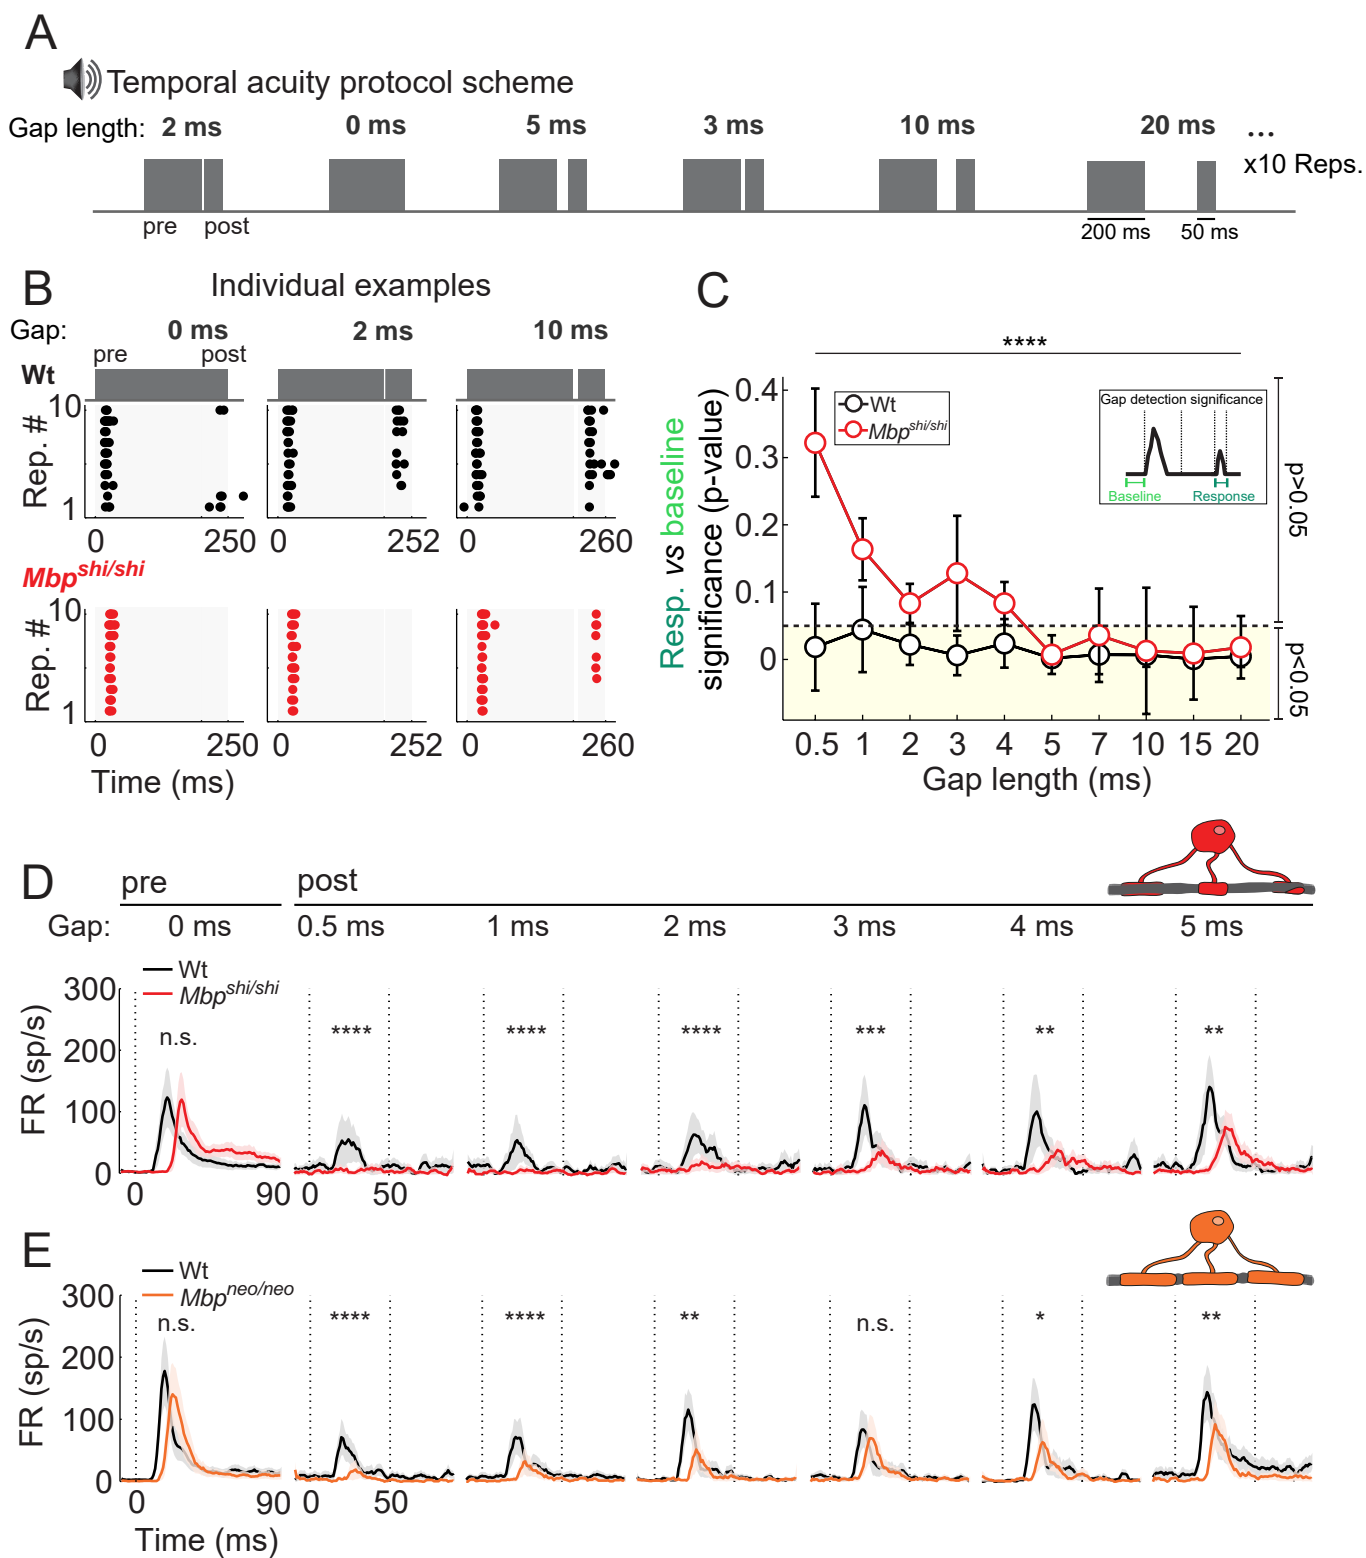

**Figure 5. Cortical temporal acuity is impaired with CNS dysmyelination.**

**A)** Schematic of the gap-detection protocol used to test temporal acuity. A 200 ms long broad-band noise (BBN) pulse (pre) was followed by a silent gap and a second 50ms long BBN pulse (post). Gap lengths ranged from 0-50 ms. Each pre-gap-post sequence was repeated 10 times for every gap length. **B)** Individual example of ACx spikes (dots) evoked during sound presentation (gray patches) and gaps of 0 ms (left), 2 ms (center), and 10 ms (right) length in a Wt (upper, black) and a *Mbp<sup>shi/shi</sup>* (lower, red) mouse during 10 stimulus repetitions (y axis) per gap length. **C)** Quantification of gap-detection significance (median statistical difference (p-value) between the baseline and the post-gap response per recording; see diagram above). A significant effect of gap-length between groups ( $p < 0.0001$ ), demonstrates that the gap detection rate in *Mbp<sup>shi/shi</sup>* ( $n = 14-20$  recordings from 14 mice) is lower than for Wt ( $n = 12-15$  recordings from 12 animals) for the shorter gaps. Error bars: standard error of the median. Dotted line: threshold at 0.05. Yellow shadow: significant gap-detection. **D)** Average PSTH across animals for Wt (black;  $n = 12$ ) and *Mbp<sup>shi/shi</sup>* (red;  $n = 14$ ) with S.E.M. as shaded area. Left to right: pre-gap responses followed by post-gap responses for 0.5 to 5 ms gaps. Significant effect of group was seen for all post-gap responses but not for pre-gap responses ( $p = 0.46$ ,  $p < 0.0001$ ,  $p < 0.0001$ ,  $p = 0.0002$ ,  $p = 0.0014$ ,  $p = 0.006$ ; pre-gap and 0.5 to 5 ms post-gap respectively). **E)** Same as in D) but for *Mbp<sup>neo/neo</sup>* (orange;  $n = 8$ ) mice and their respective Wt (black;  $n = 7$ ). Significant effect of group was seen for most post-gap responses but not for pre-gap responses ( $p = 0.60$ ,  $p < 0.0001$ ,  $p < 0.0001$ ,  $p = 0.0015$ ,  $p = 0.19$ ,  $p = 0.01$ ,  $p = 0.003$ ; pre-gap and 0.5 to 5 ms post-gap respectively). In D) and E), dotted vertical lines at time 0 ms depict the start of the sound, and at time 50 ms the end of the post BBN.



## Figure 6

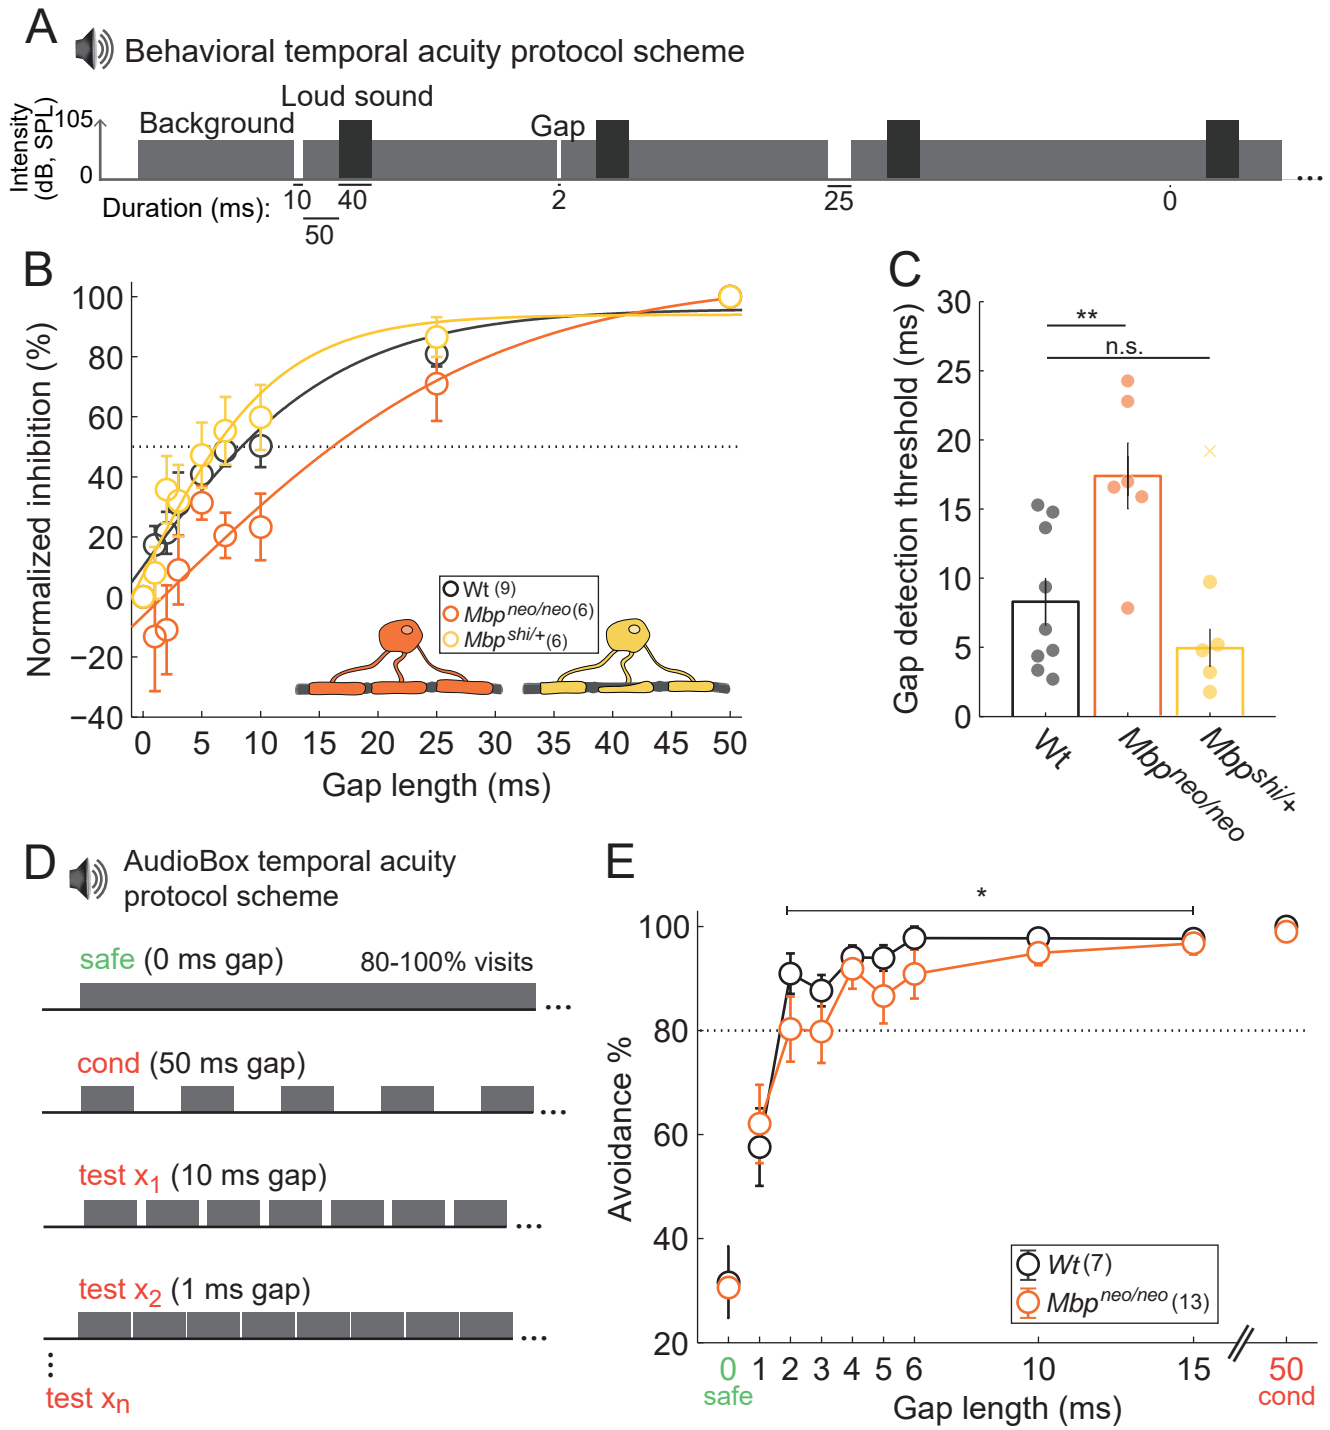

**Figure 6. Behavioral temporal acuity is impaired by CNS dysmyelination.**

**A)** Schematic of the auditory startle reflex (ASR) sound protocol. Constant background broad-band noise (BBN; 70 dB) interrupted by a startle noise (105 dB; 40 ms), occasionally preceded by a silent gap of varying length. All gaps presented were followed by 50 ms background sound before the startle appearance. Each gap-startle combination was repeated 10 times. **B)** The percentage of ASR inhibition elicited by the different gaps showed a strong relationship between the gap length and the startle inhibition. *Mbp<sup>neo/neo</sup>* but not *Mbp<sup>sh1/+</sup>* mice (with a 50% reduction in *Mbp*) showed impaired inhibition of the ASR. Dotted line: threshold at 50% inhibition used for statistical analysis in C. **C)** Gap detection threshold is increased in *Mbp<sup>neo/neo</sup>* mice ( $p=0.0048$ ), but not *Mbp<sup>sh1/+</sup>* ( $p=0.36$ ; outlier depicted with a cross), compared to Wt animals. **D)** Schematic of sounds used in the Audiobox paradigm. Safe visits to corner were accompanied by the safe sound (0 ms gap embedded in continuous BBN, ~70 dB), and water was available. Conditioned visits were accompanied by the conditioned sound (cond; BBN with 50 ms gaps) water was not available and air-puff was delivered upon nose-poke. Once animals discriminated safe and conditioned, test visits with test sounds (gaps > 0 ms and <50 ms) were introduced. Water was available in these visits. **E)** Quantification of avoidance behavior (proportion of visits without nose-pokes) revealed a reduction ( $p=0.030$ ) in *Mbp<sup>neo/neo</sup>* animals (orange;  $n=13$ ) for gaps >1 ms compared to Wt (black;  $n=7$ ) confirming a behavioral deficit in temporal acuity in a naturalistic environment. All graphs show the mean per group. Error bars depict the S.E.M.

## Figure 7

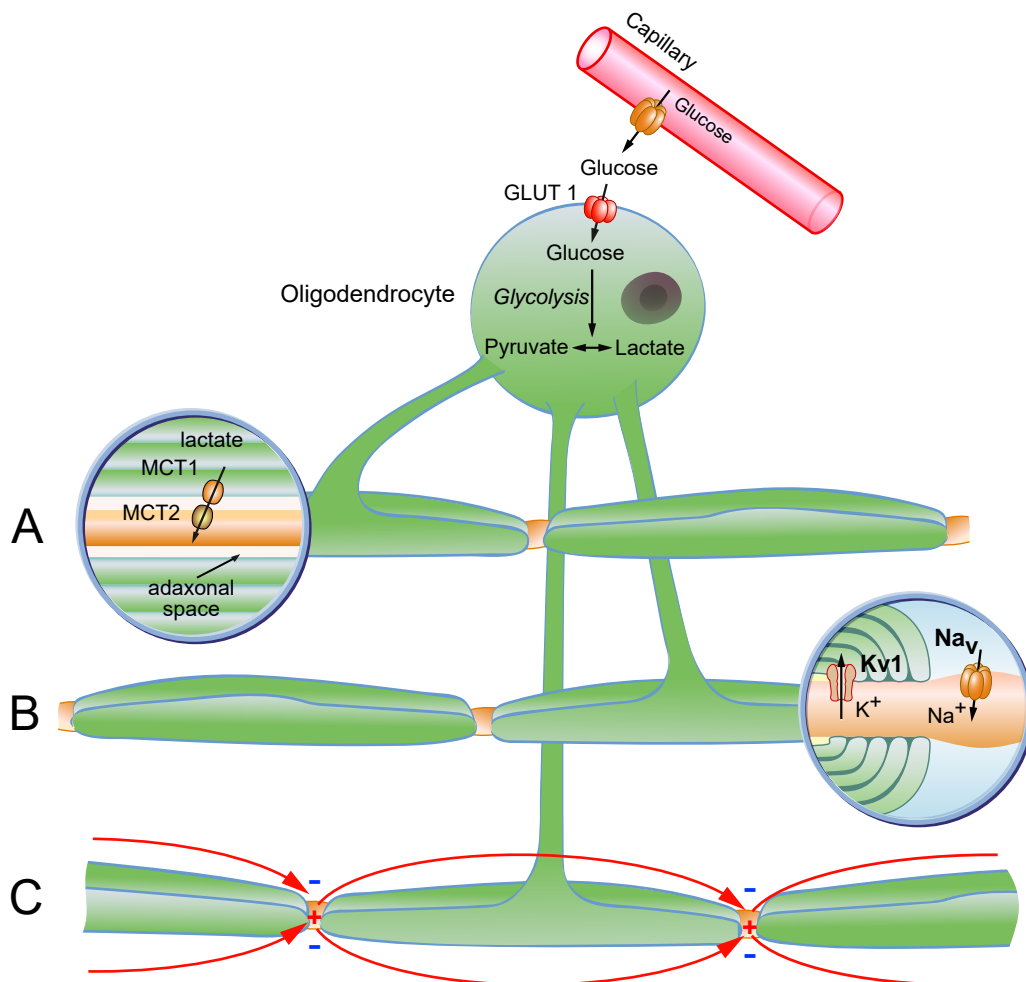

**Figure 7. Role of oligodendrocytes in information processing extends beyond conduction velocity regulation to energy support of axons and excitability of axon initial segment and nodal.**

Schematic of oligodendrocyte and compact myelin (green) wrapping around 3 axons (brown) **A)** Glycolytic oligodendrocytes can support axons via the transport of glycolytic end products, such as lactate or pyruvate. **B)** The maintenance of axonal-excitability domains through clustering of ion channels depends on myelin compaction. **C)** Myelin is essential for the formation of axonal excitable domains and contributes to the speeding up of action potential conduction.
